1 **Glucocorticoids suppress NF- $\kappa$ B-mediated neutrophil control of *Aspergillus***  
2 ***fumigatus* hyphal growth**

3

4 **Savini U. Thrikawala<sup>1</sup>, Molly Anderson<sup>1</sup>, Emily E. Rosowski<sup>1\*</sup>**

5 <sup>1</sup>Department of Biological Sciences, Clemson University, Clemson, South Carolina, United  
6 States of America

7

8 \* Corresponding author

9 E-mail: [erosows@clemson.edu](mailto:erosows@clemson.edu)

10

11

12

13

14

15

16

17

18

19

20

21

22

23

## 24 **Abstract**

25 Glucocorticoids are a major class of therapeutic anti-inflammatory and immunosuppressive  
26 drugs prescribed to patients with inflammatory diseases, to avoid transplant rejection, and as part  
27 of cancer chemotherapy. However, exposure to these drugs increases the risk of opportunistic  
28 infections such as with the fungus *Aspergillus fumigatus*. Prolonged glucocorticoid therapy is  
29 one of the main risks for invasive aspergillosis, which causes mortality in >50% of infected  
30 patients. The mechanisms by which glucocorticoids increase susceptibility to *A. fumigatus* are  
31 poorly understood. Here, we used a zebrafish larva-*Aspergillus* infection model to identify innate  
32 immune mechanisms altered by glucocorticoid treatment. Infected larvae exposed to  
33 dexamethasone succumb to the infection at a significantly higher rate than control larvae.  
34 However, both macrophages and neutrophils are still recruited to the site of infection and  
35 dexamethasone treatment does not significantly affect fungal spore killing. Instead, the primary  
36 effect of dexamethasone manifests later in infection with treated larvae exhibiting increased  
37 invasive hyphal growth. In line with this, dexamethasone predominantly inhibits neutrophil  
38 function, rather than macrophage function. Dexamethasone-induced mortality also depends on  
39 the glucocorticoid receptor. One pathway that glucocorticoids can inhibit is NF- $\kappa$ B activation  
40 and we report that dexamethasone partially suppresses NF- $\kappa$ B activation at the infection site by  
41 inducing the transcription of I $\kappa$ B via the glucocorticoid receptor. Independent CRISPR/Cas9  
42 targeting of IKK $\gamma$  to prevent NF- $\kappa$ B activation also increases invasive *A. fumigatus* growth and  
43 larval mortality. However, dexamethasone treatment of IKK $\gamma$  crisprant larvae further increases  
44 invasive hyphal growth, suggesting that dexamethasone may suppress other pathways in addition  
45 to NF- $\kappa$ B to promote host susceptibility. Collectively, we find that dexamethasone acts through

46 the glucocorticoid receptor to suppress NF- $\kappa$ B-mediated neutrophil control of *A. fumigatus*  
47 hyphae in zebrafish larvae.

## 48 **Author Summary**

49 Glucocorticoids are drugs that stop inflammation and suppress the immune system.  
50 Glucocorticoids are effective in treating inflammatory diseases such as asthma and arthritis,  
51 preventing organ rejection after transplant surgery, and in ameliorating the side effects of cancer  
52 chemotherapy. However, as these drugs suppress the immune system, patients taking  
53 glucocorticoids are more prone to infections such as with the environmental fungus *Aspergillus*  
54 *fumigatus*. The specific mechanisms that glucocorticoids inhibit to increase susceptibility to  
55 infection are largely unknown. Here, we used a larval zebrafish model of *A. fumigatus* infection  
56 to determine that glucocorticoids mainly suppress the ability of neutrophils to control the fungal  
57 hyphal growth that causes tissue damage. Our study provides insight into future strategies to treat  
58 *A. fumigatus* infection in patients undergoing glucocorticoid therapy.

## 59 **Introduction**

60 Glucocorticoids are potent immunosuppressive and anti-inflammatory drugs that are prescribed  
61 for a range of conditions, including chronic inflammation, lymphoid malignancies, autoimmune  
62 conditions, and to avoid rejection in bone marrow and solid organ transplant patients [1-3].  
63 However, prolonged use of glucocorticoids causes adverse effects such as metabolic disorders,  
64 hypertension, osteoporosis, and depression [4]. The immunosuppressive effects of  
65 glucocorticoids also increase the risk of opportunistic infections [4]. Invasive aspergillosis caused  
66 by *Aspergillus fumigatus* is the most common fungal infection associated with glucocorticoid

67 therapy [5]. While immunocompetent hosts effectively clear inhaled airborne *A. fumigatus* spores  
68 from the lungs and airways, in patients undergoing glucocorticoid therapy spores can germinate  
69 into invasive filamentous hyphae, destroying tissues and organs [6]. Anti-fungal treatments are  
70 often ineffective, partially due to growing drug resistance among fungal pathogens, and as a  
71 result >50% of infected patients do not survive [7, 8]. Glucocorticoids can inhibit multiple  
72 different molecular and cellular pathways, and it is not clear which of these effects is the main  
73 cause of susceptibility to invasive aspergillosis and other opportunistic infections. This  
74 knowledge is necessary to develop novel therapeutic approaches to treat patients with invasive  
75 aspergillosis who are undergoing glucocorticoid therapy or to develop safe glucocorticoid  
76 therapy with a lower risk of opportunistic infection.

77

78 Glucocorticoids exert their activity by binding to the glucocorticoid receptor (GR) which is a  
79 nuclear receptor [2]. Upon binding to ligand in the cytosol, GR translocates to the nucleus and  
80 activates or represses gene transcription [2]. GR can affect gene expression through three  
81 mechanisms: directly binding to glucocorticoid response elements (GRE) in the DNA sequence,  
82 trans-repression through binding to other transcription factors, or composite binding to both  
83 GREs and transcription factors at the same time [2, 3]. It is thought that the immunosuppressive  
84 effects of glucocorticoids are mainly mediated by trans-repression of nuclear factor- $\kappa$ B (NF- $\kappa$ B)  
85 [1, 9-11]. NF- $\kappa$ B is a family of transcription factors, including the canonical p65 and p50  
86 subunits, that activate inflammatory responses by promoting transcription of various signaling  
87 molecules such as cytokines [12]. Under resting conditions, p65/p50 heterodimers are bound by  
88 an inhibitor, I $\kappa$ B, and sequestered in the cytoplasm [13-17]. Downstream of activation of pattern  
89 recognition receptors (PRRs), cytokine receptors, or T/B-cell receptors [18, 19], I $\kappa$ B is

90 phosphorylated by the multi-subunit I $\kappa$ B kinase (IKK) complex, which is composed of IKK $\alpha$ ,  
91 IKK $\beta$ , and a regulatory subunit IKK $\gamma$  (NEMO) [17-20]. This phosphorylation leads to  
92 degradation of I $\kappa$ B, releasing the NF- $\kappa$ B dimers which rapidly translocate to the nucleus to  
93 initiate target gene expression [12, 17-19]. To inhibit this activation, GR can both directly bind  
94 and trans-repress NF- $\kappa$ B subunits and directly bind to the I $\kappa$ B gene promoter to induce  
95 transcription. The relative significance of each of these activities in NF- $\kappa$ B suppression by GR is  
96 debated [21-23]. Additionally, if glucocorticoid-mediated suppression of NF- $\kappa$ B is the major  
97 mechanistic cause of susceptibility to invasive aspergillosis, rather than GR-mediated effects on  
98 other pathways, is not well understood. *A. fumigatus* can induce NF- $\kappa$ B activation *in vitro* in  
99 monocytes, in bronchial epithelial cells in mice, and at the site of infection in larval zebrafish  
100 [24-26]. This activation is likely required for activation of the innate immune system, including  
101 macrophages and neutrophils, the first line of defense against *A. fumigatus* infection. However,  
102 how NF- $\kappa$ B activation regulates macrophage- and neutrophil-mediated control of *A. fumigatus*  
103 and if glucocorticoids suppress these control mechanisms *in vivo* is not understood.

104

105 In this study, we investigate these questions in a zebrafish larva-*Aspergillus* infection model  
106 which allows us to non-invasively image this dynamic host-pathogen interaction inside of a live,  
107 intact host over multiple days. Using this model, we have previously shown that macrophages  
108 mainly respond to *A. fumigatus* spores and prevent germination, while neutrophils are only  
109 recruited after spore germination into hyphae [27-29]. This is in line with previous findings that  
110 macrophages efficiently kill spores and neutrophils are efficient at killing hyphae in cell culture  
111 [30-32]. Consistently, in humans and in mammalian models, alveolar macrophages are likely to  
112 encounter spores and neutrophils are recruited from the blood secondarily [33]. The immune

113 system of zebrafish is largely conserved with humans and during the larval stage primarily  
114 consists of macrophages and neutrophils, facilitating the study of phagocyte-specific  
115 mechanisms with no interference from the adaptive system [34]. The zebrafish model has been  
116 instrumental in modeling a range of human infections to better understand host-pathogen  
117 mechanisms, such as mycobacterial granuloma formation [35].

118

119 We report that exposure to the glucocorticoid drug dexamethasone significantly increases the  
120 mortality of *A. fumigatus*-infected larvae, recapitulating the susceptibility of glucocorticoid-  
121 treated human patients. Through CRISPR/Cas9 targeting of GR, we demonstrate that  
122 dexamethasone activity is mediated via GR in larval zebrafish. To determine the host innate  
123 mechanisms that are inhibited by dexamethasone treatment we used daily, live imaging of  
124 infected larvae in combination with established innate immune cell-deficiency models. We report  
125 that the increased mortality of infected hosts is primarily due to a decrease in neutrophil-  
126 mediated control of invasive hyphal growth. Dexamethasone treatment induces I $\kappa$ B transcription  
127 and suppresses *A. fumigatus*-induced NF- $\kappa$ B activation. Although inhibition of other minor  
128 pathways may also promote susceptibility to *A. fumigatus* infection, CRISPR/Cas9 targeting of  
129 IKK $\gamma$  phenocopies dexamethasone treatment, suggesting that the effects of glucocorticoids are  
130 largely due to the inhibition of NF- $\kappa$ B signaling and inhibition of neutrophil function.

## 131 **Results**

### 132 **Dexamethasone exposure decreases survival of zebrafish larvae infected with *A. fumigatus*** 133 **and suppresses NF- $\kappa$ B activation at the infection site**

134 Glucocorticoid drugs such as dexamethasone increase host susceptibility to *A. fumigatus*  
135 infection, but the cellular mechanisms through which this occurs are largely unknown [6]. To  
136 investigate this question, we used an established larval zebrafish host model [26, 27, 36]. We  
137 injected *A. fumigatus* spores of the CEA10 strain into the hindbrain ventricle of 2 days post  
138 fertilization (dpf) wild-type larvae and immediately exposed larvae to 10  $\mu$ M dexamethasone or a  
139 DMSO vehicle control. Dexamethasone-exposed larvae succumb to the infection at a  
140 significantly higher rate than control larvae, with a hazard ratio of 2.5, indicating that  
141 dexamethasone-exposed larvae are 2.5 times more likely to succumb to the infection as  
142 compared to control larvae (Fig 1A), consistent with previous results [26]. No significant survival  
143 defect due to dexamethasone treatment is observed in PBS-injected mock-infected larvae (Fig  
144 1A).

145  
146 The *A. fumigatus* CEA10 strain induces NF- $\kappa$ B activation at the site of infection, and  
147 glucocorticoids can suppress NF- $\kappa$ B activity [1, 26]. To test if dexamethasone suppresses NF- $\kappa$ B  
148 activation in this infection model, we used a previously published NF- $\kappa$ B reporter transgenic  
149 zebrafish line that express EGFP under an NF- $\kappa$ B responsive promoter (*Tg(NF- $\kappa$ B RE:GFP)*)  
150 [37]. We injected *NF- $\kappa$ B RE:GFP* larvae with *A. fumigatus* CEA10 spores, imaged the infection  
151 site 1 and 2 days post injection (dpi), and quantified EGFP expression (Fig 1B). Dexamethasone-  
152 exposed larvae have lower EGFP expression than control larvae, although this difference is only  
153 statistically significant at 1 dpi (Figs 1C and S1A). We then tested if dexamethasone suppresses

154 the expression of specific NF- $\kappa$ B target cytokine genes using RT-qPCR. Since fungal  
155 germination drives NF- $\kappa$ B activation we screened larvae by microscopy prior to RNA extraction  
156 and split larvae into two groups based on whether hyphae were present or not. At 1 dpi, the  
157 expression of NF- $\kappa$ B target genes *tnfa* and *illb* was not yet induced by germination, although  
158 dexamethasone treatment significantly inhibited *tnfa* expression even in larvae without  
159 germination (Fig 1D). At 2 dpi, germination increases *tnfa* expression ~20-fold in larvae exposed  
160 to DMSO, and this is only partially suppressed by dexamethasone treatment, potentially because  
161 dexamethasone treated larvae may experience more hyphal growth and therefore more immune  
162 activation overall (Fig 1D). *illb* is only induced ~2-fold by germination at 2 dpi but  
163 dexamethasone significantly inhibits *illb* expression in larvae without germinated spores (Fig  
164 1D). Another marker of macrophage activation, *irg1*, is also induced by germination at 1 dpi and  
165 inhibited by dexamethasone treatment (S1B Fig). Additionally, the expression of anti-  
166 inflammatory genes *il10* and *tgfb* are significantly inhibited by dexamethasone treatment at 1 dpi  
167 but increased at 2 dpi (S1B Fig). Overall, these data demonstrate that dexamethasone can affect  
168 host gene expression of inflammatory markers, including NF- $\kappa$ B-regulated genes, although  
169 increased fungal germination and growth may override this suppression.

170

171 To determine the mechanism through which dexamethasone inhibits NF- $\kappa$ B activation, we tested  
172 the expression of the *ikbaa* gene which encodes I $\kappa$ B $\alpha$ , the inhibitor of NF- $\kappa$ B. Dexamethasone-  
173 treated larvae have higher expression of *ikbaa*, regardless of infection status (Fig 1E). These  
174 results demonstrate that during *A. fumigatus* infection, one mechanism through which  
175 glucocorticoids inhibit NF- $\kappa$ B activation is by increasing transcription of this inhibitor.

176



177 **Glucocorticoid receptor is required for dexamethasone-mediated immunosuppression**

178 In mammals, glucocorticoids primarily mediate their effects through the glucocorticoid receptor  
179 [38]. To determine if the increased susceptibility of dexamethasone-treated larvae to *A. fumigatus*  
180 infection was due to signaling through this receptor, and not to off-target effects on either the  
181 host or pathogen, we used CRISPR/Cas9 to target the zebrafish glucocorticoid receptor gene  
182 *nr3c1*. We designed two gRNAs: one targeting exon 2 which encodes the N-terminal domain and  
183 the other targeting exon 4 which encodes part of the DNA binding domain (S2A Fig). We  
184 injected embryos at the 1 cell stage with both gRNAs targeting *nr3c1* or control gRNAs targeting  
185 *luciferase*, together with Cas9 protein. PCR using primers flanking the target sites on genomic  
186 DNA isolated from 2 dpf larvae confirmed successful targeting of DNA (S2B Fig). In these same  
187 F0 injected crispants, we tested if dexamethasone can induce *ikbaa* expression as seen with wild-  
188 type larvae (Fig 1E). Dexamethasone significantly induces *ikbaa* expression in control larvae but  
189 fails to induce any expression in *nr3c1* crispant larvae (Fig 1F), indicating that GR function is  
190 abolished in these crispant larvae and that I $\kappa$ B-mediated suppression of NF- $\kappa$ B activation by  
191 dexamethasone depends on the glucocorticoid receptor. Further, we tested the effects of *nr3c1*  
192 mutation in survival of infected larvae. While dexamethasone-exposed control larvae succumb to  
193 *A. fumigatus* infection, dexamethasone has no effect on survival of infected *nr3c1* crispant larvae  
194 (Fig 1G). Targeting of *nr3c1* had no effect on the survival of PBS mock-infected larvae (S2C  
195 Fig). Additionally, direct exposure of *A. fumigatus* spores to dexamethasone has no effect on  
196 spore germination or hyphal growth (S3 Fig). These data indicate that the immunosuppressive  
197 effects of dexamethasone in the context of *A. fumigatus* infection depend solely on signaling  
198 through a functional glucocorticoid receptor.

199

200 **Dexamethasone partially suppresses macrophage recruitment, but not neutrophil**  
201 **recruitment**

202 We next sought to understand how dexamethasone mediates phagocyte responses to *A.*  
203 *fumigatus*. As dexamethasone suppresses pro-inflammatory cytokine expression (Fig 1D), we  
204 hypothesized that phagocyte recruitment would be inhibited by dexamethasone. We injected ~30  
205 GFP-expressing *A. fumigatus* spores into larvae expressing mCherry in macrophages  
206 (*Tg(mpeg1:H2B-mCherry)*) and BFP in neutrophils (*Tg(lyz:BFP)*) and treated larvae with  
207 dexamethasone or DMSO vehicle control. We enumerated macrophage and neutrophil  
208 recruitment to the infection site through daily, live confocal imaging of infected larvae. In line  
209 with previous findings [26, 39], macrophages arrive first and form clusters around spores starting  
210 at 1 dpi (Fig 2A). A significantly higher number of macrophages arrive at 2 dpi in control larvae  
211 compared to dexamethasone-treated larvae, yet ~90 macrophages still arrive at the infection site  
212 in dexamethasone-treated larvae (Fig 2B). Macrophage cluster area is not significantly different  
213 between the two groups (Fig 2C). Macrophage clusters resolve from 3-5 dpi in DMSO-exposed  
214 larvae (Fig 2B, C). However, in dexamethasone-exposed larvae, more macrophages are recruited  
215 later in the infection with a significantly higher number of macrophages and larger cluster area at  
216 5 dpi (Fig 2B, C). Neutrophils respond starting at 2 dpi, primarily after spores start to germinate,  
217 and neutrophils are able to infiltrate into macrophage clusters (Fig 2A). The number of recruited  
218 neutrophils is not significantly different between dexamethasone- and DMSO-treated larvae at 1,  
219 2, or 3 dpi (Fig 2D). At 5 dpi, similar to macrophages, a significantly higher number of  
220 neutrophils is present at the infection site in larvae exposed to dexamethasone compared to  
221 control larvae (Fig 2D). This is likely due to increased fungal growth attracting more  
222 macrophages and neutrophils to the infection site, as described previously [39]. Injected *A.*

223 *fumigatus* spores can germinate, and after germination, the fungal filamentous growth can branch  
224 and form a network of hyphae, which we classified as invasive hyphae. To normalize for  
225 differences in this fungal growth, we analyzed the number of macrophages and neutrophils at  
226 specific stages of fungal germination and invasive hyphal growth. On the day that germination is  
227 first observed in larvae, the number of macrophages at the infection site is significantly lower in  
228 dexamethasone-exposed larvae compared to control larvae (Fig 2E). However, macrophage  
229 numbers on the day before germination is observed and on the day that invasive hyphae is first  
230 observed are not significantly different between dexamethasone- and control-treated larvae (Fig  
231 2E), and neutrophil numbers are also similar between the two conditions throughout the infection  
232 (Fig 2F). Overall, we find that many phagocytes are still recruited to the infection site in  
233 dexamethasone-treated larvae. Dexamethasone has no effect on neutrophil recruitment but can  
234 curb macrophage recruitment earlier in infection. However, immune activation from fungal  
235 germination can override dexamethasone-mediated suppression of macrophage recruitment at  
236 later stages of infection.

237

### 238 **Spore killing is not significantly impacted by dexamethasone exposure**

239 As phagocytes are able to migrate to the site of infection even in dexamethasone-treated larvae,  
240 we hypothesized that the functions of phagocyte-mediated control of *A. fumigatus* are impacted  
241 by dexamethasone. The first step in the phagocyte response is macrophage-mediated  
242 phagocytosis of spores and spore killing [33, 40]. To test whether dexamethasone treatment  
243 decreases macrophage-mediated spore killing, we used an established live-dead staining method  
244 in which *A. fumigatus* spores expressing GFP are coated with AlexaFluor546 via cell wall cross-  
245 linking [26, 39]. We injected these spores into larvae expressing BFP in macrophages

246 (*Tg(mfap4:BFP)*) and imaged the infection site at 2 dpi. We then quantified the percentage of  
247 live spores (AlexaFluor+ and GFP+) versus dead spores (AlexaFluor+ and GFP-) (Fig 3A).  
248 Dexamethasone-treated larvae are slightly worse at killing injected spores than control larvae,  
249 although this difference is not statistically significant (Fig 3B). To further quantify spore burden  
250 over time, we homogenized and plated larvae to quantify CFUs from dexamethasone-treated or  
251 control larvae across 7 days of infection. In agreement with the live-dead staining results, we  
252 find no significant difference in CFU burden in dexamethasone-treated larvae compared to  
253 control larvae (Fig 3C).

254

### 255 **Invasive hyphal growth post-germination is increased in dexamethasone-treated larvae**

256 As spore killing is only minorly inhibited by dexamethasone treatment, we hypothesized that in  
257 dexamethasone-exposed hosts phagocytes fail to control *A. fumigatus* germination and invasive  
258 hyphal growth. To quantify fungal growth over time, we went back to our daily imaging  
259 experiment (Fig 2) and monitored spore germination and invasive hyphal growth from the GFP  
260 signal expressed by *A. fumigatus*. As these experiments were done with a fast-germinating  
261 CEA10-derived strain, spore germination occurs at high levels by 2 dpi and the rate of spore  
262 germination is not significantly different in dexamethasone-exposed larvae compared to control  
263 DMSO-exposed larvae (Fig 4A, B). The cumulative percentage of larvae that experience  
264 invasive hyphal growth (presence of branched hyphae) is significantly higher with  
265 dexamethasone exposure compared to control conditions (Fig 4B). We also quantified the fungal  
266 burden in larvae across the full 5 day experiment by measuring the GFP+ area, confirming that  
267 dexamethasone-treated larvae experience significantly more fungal growth compared to control  
268 larvae (Fig 4C). Next, we rated the severity of fungal growth using a scoring system of 0 to 4,

269 from no germination to invasive hyphal growth (S4 Fig). In larvae exposed to dexamethasone,  
270 invasive hyphal growth becomes severe quickly, within 2-3 days, and causes mortality, while  
271 many control larvae are able to delay this invasive growth (Fig 4D). These data suggest that  
272 dexamethasone treatment decreases the ability of host immune cells to inhibit post-germination  
273 invasive hyphal growth of *A. fumigatus*.

274

### 275 **Dexamethasone predominantly suppresses neutrophil function to cause host susceptibility**

276 To confirm that dexamethasone impacts the ability of host innate immune cells to control the  
277 invasive growth stages of *A. fumigatus*, we generated zebrafish larvae without macrophages and  
278 neutrophils, the primary innate immune cells active in zebrafish larvae[34]. If dexamethasone  
279 increases host susceptibility by inhibiting the function of these cells, then in larvae that already  
280 lack these cells we expect that dexamethasone treatment would not significantly decrease host  
281 survival. To prevent the development of both macrophages and neutrophils we injected 1 cell  
282 embryos with a high concentration of *pu.1* morpholino, knocking down expression of the *pu.1*  
283 (*spilb*) transcription factor required for phagocyte development [41]. In larvae that do not  
284 develop phagocytes, >90% of larvae succumb to *A. fumigatus* infection regardless of  
285 dexamethasone exposure, supporting the idea that dexamethasone primarily inhibits the function  
286 of these cells to cause host susceptibility (S5A Fig).

287

288 While neutrophil function is thought to predominate during control of invasive growth post-  
289 germination, macrophages can also attack hyphae and may play a role in control of hyphal  
290 growth [42]. We therefore sought to determine the relative impact of dexamethasone on  
291 macrophage versus neutrophil function against infection. To do this, we employed established

292 models of neutrophil-defective or macrophage-deficient larvae. If dexamethasone predominantly  
293 suppresses neutrophil-mediated mechanisms, we expect dexamethasone to cause no additional  
294 survival defect in larvae that already do not have functional neutrophils. We infected neutrophil-  
295 defective (*Tg(mpx:mCherry-2A-rac2D57N)*) larvae, in which neutrophils are unable to migrate  
296 to the infection site, with *A. fumigatus* spores, treated larvae with either dexamethasone or  
297 DMSO vehicle control, and monitored survival [43]. Consistent with previous results [26],  
298 neutrophil-defective larvae succumb to the infection at a higher rate than control wild-type larvae  
299 (Fig 5A). Dexamethasone further decreases survival of neutrophil-defective larvae (Fig 5A).  
300 While wild-type larvae treated with dexamethasone are 4.3 times more likely succumb to the  
301 infection compared to vehicle control larvae, neutrophil-defective larvae are only 2.2 times more  
302 likely to succumb due to treatment. Dexamethasone treatment does not affect survival of PBS  
303 mock-infected larvae (S5B Fig). These results suggest that dexamethasone can affect the  
304 function of other cell types remaining in these neutrophil-defective larvae but that neutrophils are  
305 also a major target of dexamethasone.

306

307 Next, we performed these experiments in macrophage-deficient larvae. First, we used clodronate  
308 liposomes to deplete macrophages. Macrophage-depleted larvae succumb to the infection, and  
309 dexamethasone further increases mortality of these larvae (S5C Fig). However, dexamethasone  
310 causes significant mortality in macrophage-depleted PBS-injected mock-infected larvae (S5D  
311 Fig), making results from these experiments difficult to interpret. Instead, to prevent the  
312 development of macrophages, we used a low concentration of *pu.1* morpholino that affects  
313 macrophage but not neutrophil development [44]. We confirmed that at this concentration  
314 macrophages are depleted but neutrophils remain intact and functional (S5E-G Fig). Consistent

315 with previous results [26], macrophage deficiency alone does not significantly affect the survival  
316 of larvae infected with the CEA10 strain of *A. fumigatus* (Fig 5B). Additionally, dexamethasone  
317 does not affect the survival of PBS mock-infected *pu.1* morphant larvae (S5H Fig). However,  
318 dexamethasone exposure increases the susceptibility of both control and macrophage-deficient *A.*  
319 *fumigatus* infected larvae (Fig 5B). Dexamethasone-exposed macrophage-deficient larvae are 7.9  
320 times more likely to succumb to the infection compared to vehicle exposure, while control larvae  
321 which are 4.8 times more likely to succumb to the infection after dexamethasone treatment (Fig  
322 5B). Therefore, when macrophages are not present and neutrophils are the major immune cell  
323 present, dexamethasone has a greater impact on host survival. These results are in contrast to  
324 experiments in the neutrophil-defective line, where macrophages are the major immune cell  
325 present and dexamethasone has a lower impact on host survival. Overall, these data demonstrate  
326 that dexamethasone-mediated suppression of neutrophil function is a major cause of host  
327 susceptibility to *A. fumigatus* infection.

328  
329 To further study the effect of dexamethasone on neutrophil function, we used an *irf8* mutant line,  
330 which lacks macrophages and has a compensating increase in neutrophil numbers [45]. *irf8*<sup>-/-</sup>  
331 larvae are significantly more susceptible to infection when exposed to dexamethasone compared  
332 to vehicle control (Fig 5C). However, the relative increase in susceptibility is similar to that of  
333 *irf8*<sup>+/-</sup> and *irf8*<sup>+/+</sup> control larvae, suggesting that an increased number of neutrophils can partially  
334 compensate for the suppressive effects of dexamethasone on neutrophil function (Fig 5C).

335

336 **Neutrophils fail to control invasive hyphal growth in dexamethasone-treated larvae**

337 So far, we have established that dexamethasone predominantly suppresses the function of  
338 neutrophils to cause susceptibility to *A. fumigatus* (Fig 5). This is consistent with our finding that  
339 dexamethasone exposure leads to increased invasive hyphal growth inside of larvae (Fig 4), as  
340 neutrophils are the primary innate immune cell responsible for clearing *A. fumigatus* hyphae. To  
341 focus specifically on the effects of dexamethasone on neutrophil-mediated control of hyphae, we  
342 decided to further characterize the effects of dexamethasone exposure on infected *irf8*<sup>-/-</sup> larvae  
343 which lack macrophages and have an excess of neutrophils. We infected *irf8*<sup>-/-</sup> larvae with  
344 labeled neutrophils (*Tg(lyz:BFP)*) with a GFP-expressing strain of *A. fumigatus*, treated larvae  
345 with dexamethasone or vehicle control, and performed live imaging at 1, 2, 3, and 5 dpi (Fig 6).  
346 As none of these larvae have macrophages which are the cell type primarily responsible for  
347 preventing spore germination [26], we observed similar levels of germination in larvae exposed  
348 to both dexamethasone and DMSO, with all larvae harboring germinated spores by 3 dpi (Fig  
349 6A, B). However, the cumulative percentage of larvae harboring invasive hyphae is significantly  
350 higher in dexamethasone-treated larvae compared to vehicle control-treated larvae (Fig 6B). This  
351 is due to a lack of fungal growth control post-germination. There is no significant effect of  
352 dexamethasone treatment on the day that germination occurs, with the majority of larvae  
353 experiencing germination at 1 dpi regardless of treatment group (Fig 6D). However,  
354 dexamethasone-exposed larvae develop initial invasive hyphae as early as ~2 dpi on average,  
355 while it takes ~3 days for DMSO-exposed larvae to develop invasive hyphae (Fig 6E). Once  
356 germination occurs, invasive hyphae appears on average 1 day later in dexamethasone-exposed  
357 larvae as compared to an average of 1.5 days later in DMSO-exposed larvae (Fig 6F). Analysis  
358 of the severity of fungal growth or quantification of fungal area in all individual larvae across all



359 days of the experiment demonstrates that dexamethasone-treated *irf8* mutant larvae experience  
360 uncontrolled hyphal growth (Figs 6C and S6A). Although germination occurs in all larvae,  
361 neutrophils in DMSO-treated larvae are able to delay the development of severe invasive growth  
362 of hyphae, while dexamethasone-exposed larvae quickly develop severe invasive hyphae and  
363 succumb to the infection (Fig 6C).

364

365 In dexamethasone-treated *irf8*<sup>-/-</sup> larvae, we observed many neutrophils at the infection site,  
366 clustering around the fungus (Fig 6A), suggesting that in these larvae dexamethasone inhibits  
367 neutrophil function rather than neutrophil recruitment, as we observed in wild-type larvae (Fig  
368 2). To confirm this, we quantified neutrophil cluster area both across all days of imaging and  
369 normalized to the germination status of larvae, finding no statistically significant differences  
370 between larvae treated with dexamethasone or vehicle control (S6B, C Fig). As expected, there is  
371 a positive correlation between fungal area and neutrophil cluster area in both vehicle- and  
372 dexamethasone-treated larvae (S6D Fig). However, when we plotted the neutrophil cluster area  
373 relative to the fungal area, the slope of this correlation is slightly lower in dexamethasone-treated  
374 larvae, suggesting that for a given fungal load these larvae may recruit fewer neutrophils (S6D  
375 Fig). Overall, a decrease in neutrophil recruitment may play a minor role in the lack of fungal  
376 control in *irf8* mutant dexamethasone-treated larvae, but an inhibition of neutrophil function  
377 against hyphae by this drug is likely the major factor leading to host susceptibility.

378

### 379 **Neutrophil-mediated control of invasive hyphal growth requires NF- $\kappa$ B**

380 Our results thus far demonstrate that 1) dexamethasone treatment inhibits NF- $\kappa$ B at the site of *A.*  
381 *fumigatus* infection and 2) dexamethasone primarily impacts neutrophil function to cause host

382 susceptibility to *A. fumigatus*. We therefore wanted to confirm that NF- $\kappa$ B signaling is required  
383 for neutrophil function against *A. fumigatus* growth, independent of dexamethasone treatment.  
384 We used CRISPR/Cas9 to target *ikbkg* (inhibitor of nuclear factor kappa B kinase regulatory  
385 subunit gamma), which encodes IKK $\gamma$  (NEMO) and is required for canonical NF- $\kappa$ B activation  
386 [20]. We designed two gRNAs targeting exons 2 and 3, both of which are part of the N-terminal  
387 IKK $\alpha\beta$  binding domain (S7A Fig). We injected embryos at the 1 cell stage with both gRNAs  
388 targeting *ikbkg* or control gRNAs targeting *luciferase*, together with Cas9 protein. PCR using  
389 primers flanking the target sites on genomic DNA isolated from 2 dpf larvae confirmed  
390 successful targeting of DNA (S7B Fig). To test the survival of both control and macrophage-  
391 deficient larvae, we injected gRNAs and Cas9 into embryos from an *irf8*<sup>+/-</sup> in-cross and infected  
392 the resulting larvae with *A. fumigatus*. *irf8*<sup>+/+</sup> or *irf8*<sup>+/-</sup> *ikbkg* crispant larvae succumb to the  
393 infection at a significantly higher rate than larvae injected with control gRNAs (Fig 7A). In *irf8*<sup>-/-</sup>  
394 larvae, *ikbkg* targeting has an even larger effect on survival, demonstrating that when neutrophils  
395 are the primary immune cell type present, NF- $\kappa$ B activation plays a major role in promoting host  
396 survival (Fig 7A).

397

398 To determine the requirement for NF- $\kappa$ B signaling in neutrophil-mediated control of invasive  
399 hyphae, we focused again on *irf8*<sup>-/-</sup> larvae and performed daily live imaging of *ikbkg* crispant  
400 larvae or control *luciferase*-targeted larvae after infection with a GFP-expressing strain of *A.*  
401 *fumigatus* (Fig 7B-H). As seen previously, almost all *irf8*<sup>-/-</sup> larvae experience germination,  
402 regardless of gRNA injection (Fig 7A, B). However, the percentage of larvae with invasive  
403 hyphae is significantly higher in *ikbkg* crispant larvae compared to *luciferase*-targeted controls  
404 (Fig 7B, C). Additionally, *ikbkg* crispant larvae have higher fungal burdens as measured by

405 fungal area, with statistically significantly higher burden at 3 dpi compared to control larvae (Fig  
406 7D). Analysis of the severity of fungal growth indicates that control larvae are able to delay the  
407 development of invasive hyphal growth while *ikbkg* crispant larvae are not (Fig 7E). While  
408 germination appears at 1 dpi on average in both *ikbkg* crispant and control larvae (Fig 7F),  
409 invasive hyphae also appear as early as 1 dpi in *ikbkg* crispant larvae (Fig 7G). In control larvae,  
410 *A. fumigatus* takes ~2 days to develop invasive hyphae after germination while this occurs on the  
411 same day in *ikbkg* crispant larvae (Fig 7G, H). Together, these data demonstrate that in *irf8*  
412 mutant larvae in which neutrophils are solely responsible for fungal control, genetic NF- $\kappa$ B  
413 pathway inhibition through *ikbkg* (IKK $\gamma$ ) targeting with CRISPR/Cas9 phenocopies  
414 dexamethasone treatment. The effect of *ikbkg* targeting on neutrophil recruitment to the infection  
415 site is also similar to effect of dexamethasone (S8 Fig). These data are consistent with the  
416 conclusion that the major signaling pathway inhibited by dexamethasone to inhibit neutrophil-  
417 mediated control of invasive hyphal growth is NF- $\kappa$ B.

418  
419 To test if dexamethasone treatment has other NF- $\kappa$ B independent effects, we exposed infected  
420 *irf8*<sup>-/-</sup>, *ikbkg* crispant or control *luciferase*-targeted larvae to dexamethasone or vehicle control.  
421 We then monitored fungal germination and hyphal growth by live imaging at 1 and 2 dpi. As  
422 expected, *A. fumigatus* germinates readily in larvae in all four conditions (Fig 7I). However, we  
423 did observe minor differences in the percentage of larvae harboring invasive hyphal growth.  
424 Control *luciferase* gRNA + DMSO larvae have the lowest rate of hyphal growth, while either  
425 dexamethasone treatment or *ikbkg* targeting alone increases this rate (Fig 7I). The combination of  
426 both *ikbkg* gRNA and dexamethasone exposure increases the percentage of larvae with invasive  
427 hyphae further (Fig 7I). These data suggest that dexamethasone may inhibit other pathways

428 besides NF- $\kappa$ B that have minor roles in promoting neutrophil control of invasive hyphal growth.  
429 Overall, however, our data demonstrate that the primary effect of dexamethasone in causing host  
430 susceptibility to *A. fumigatus* infection is through inhibition of NF- $\kappa$ B-activated neutrophil  
431 functions against invasive fungal growth.

## 432 **Discussion**

433 Prolonged glucocorticoid therapy is one of the major risk factors for invasive aspergillosis [7, 46].  
434 The anti-inflammatory and immunosuppressive effects of glucocorticoids are largely caused by  
435 inhibition of NF- $\kappa$ B transcription factor activation and signaling [1]. *A. fumigatus* infection  
436 activates NF- $\kappa$ B *in vitro* and *in vivo* [26, 47], but it has been unclear if NF- $\kappa$ B suppression is the  
437 main mechanism of glucocorticoid-mediated susceptibility to invasive aspergillosis in these  
438 patients. Here, we used an *A. fumigatus*-zebrafish larvae infection system to demonstrate that  
439 glucocorticoids induce susceptibility in infected larvae through glucocorticoid receptor-mediated  
440 suppression of NF- $\kappa$ B. To elucidate this pathway, we used CRISPR/Cas9 to target the  
441 glucocorticoid receptor and the NF- $\kappa$ B pathway activator IKK $\gamma$ . Glucocorticoid receptor and  
442 IKK $\gamma$  are essential genes during development and cannot be easily targeted for infection studies  
443 in mice as mice lacking these genes are not viable [48, 49]. By using F0 mosaic crispant zebrafish  
444 larvae, we were able to inhibit the function of these genes in viable, morphologically normal,  
445 developing organisms. We find similar disease phenotypes in larvae exposed to dexamethasone  
446 and in IKK $\gamma$  crispant larvae, demonstrating that inhibition of NF- $\kappa$ B is the major mechanism  
447 responsible for glucocorticoid-mediated susceptibility to *A. fumigatus* infection. However, IKK $\gamma$   
448 crispant larvae have a more severe disease phenotype when combined with dexamethasone,  
449 compared to either IKK $\gamma$  mutation or dexamethasone alone, suggesting that dexamethasone also

450 suppresses other minor pathways that contribute to control of fungal growth. One possible  
451 pathway that remains to be tested is activator protein-1 (AP-1) activation, which can be  
452 suppressed by glucocorticoids [50], and can be activated by *A. fumigatus* hyphae stimulation of  
453 mouse dendritic cells and alveolar macrophages [51, 52].

454

455 The key cellular immune mechanisms against *A. fumigatus* that are inhibited by glucocorticoid  
456 therapy have also been unclear. Glucocorticoids can affect all immune cell types to alter an  
457 inflammatory response [6]. Glucocorticoids potently suppress T-cell mediated responses, which  
458 are an integral component of anti-fungal immune mechanisms [6, 53]. However, larval zebrafish  
459 at the stage that was used for our study have not yet developed an adaptive system, and we have  
460 focused on the effects of dexamethasone on macrophages and neutrophils, cells that play key  
461 roles in host defense against different stages of fungal growth [26, 31, 32, 54]. Our results  
462 demonstrate that dexamethasone can still worsen *A. fumigatus* pathogenesis even before the  
463 involvement of the adaptive system [34]. To address whether dexamethasone primarily inhibits  
464 the function of macrophages or neutrophils or both, we used zebrafish larvae deficient for  
465 specific phagocyte populations. We find that dexamethasone does increase mortality in  
466 neutrophil-defective larvae, in which macrophages are the primary immune cells present,  
467 indicating that glucocorticoids can suppress macrophage-specific mechanisms. In monocytes and  
468 macrophages, glucocorticoids can suppress monocyte-to-macrophage maturation, chemotaxis to  
469 the infection site, phagocytosis, phagolysosomal fusion, oxidative killing, and pro-inflammatory  
470 cytokine secretion [6, 55]. In particular, in response to *Aspergillus* infections, glucocorticoids  
471 curb reactive oxygen species (ROS) production and autophagy-related protein recruitment to  
472 phagosomes downstream of ROS *in vitro* [31, 56]. Glucocorticoids can also alter macrophage M1

473 to M2 polarization, which can inhibit the ability of macrophages to prevent spore germination  
474 [57, 58]. In our study, we do find that dexamethasone treatment moderately inhibits macrophage  
475 recruitment to the infection site, but only at specific stages of infection, and even then, many  
476 macrophages are still present. We find no effect of dexamethasone on the ability of macrophages  
477 to kill spores or prevent germination *in vivo*. Additionally, the relative increase in susceptibility  
478 due to dexamethasone treatment in these larvae is actually less than in wild-type treated larvae,  
479 suggesting that macrophages are not the major target of this drug in inducing susceptibility to *A.*  
480 *fumigatus* infection.

481  
482 In macrophage-deficient larvae, in which neutrophils are the primary immune cell present,  
483 dexamethasone increases mortality even more than in wild-type larvae, demonstrating that the  
484 inhibition of neutrophil function is a major target of dexamethasone-mediated susceptibility to *A.*  
485 *fumigatus* infection. In line with this conclusion, we report that dexamethasone curbs immune  
486 control of invasive hyphal growth, which is predominantly mediated by neutrophils. However,  
487 dexamethasone treatment does not prevent neutrophil migration to the infection site. We find  
488 large numbers of neutrophils in response to invasive hyphae in both wild-type and macrophage-  
489 deficient larvae in the presence of dexamethasone. Similarly, in rabbits treated with  
490 glucocorticoids, pulmonary lesions of invasive aspergillosis comprise neutrophil and monocyte  
491 infiltration and tissue necrosis [59]. Therefore, we conclude that dexamethasone inhibits the  
492 function of these cells against fungal infection. Neutrophils are efficient killers of hyphae and  
493 use multiple extracellular killing mechanisms such as degranulation, neutrophil extracellular  
494 traps (NETs), and the production of ROS [60]. Which of these mechanisms are most important  
495 against *A. fumigatus* and which are inhibited by dexamethasone treatment remains unclear.

496 Neutrophils can undergo NETosis in response to *A. fumigatus* hyphae to control further growth  
497 [61-63], but the role of neutrophil-mediated ROS in *A. fumigatus* hyphal control is inconclusive  
498 [64, 65].

499

500 While our results demonstrate that dexamethasone inhibits NF- $\kappa$ B activation and this NF- $\kappa$ B  
501 activation promotes neutrophil functions against *A. fumigatus* hyphae, we cannot yet conclude  
502 whether this NF- $\kappa$ B activation is cell-intrinsic to neutrophils or non-cell-autonomous. We  
503 hypothesize that glucocorticoids inhibit activation of NF- $\kappa$ B in neutrophils, but cannot rule out  
504 the possibility that glucocorticoids inhibit activation of epithelial cells or macrophages,  
505 decreasing signals from these cells that activate neutrophils. Germination of spores exposes  
506 immunogenic ligands or pathogen-associated molecular patterns (PAMPs) such as  $\beta$ -glucans,  
507 which are otherwise masked by melanin and rodlet proteins in *A. fumigatus* spores, and this  
508 PAMP exposure induces a robust pro-inflammatory response that is likely mediated by all of  
509 these cells [66-68]. In our experiments, spore germination is the primary factor driving phagocyte  
510 recruitment, activation of an NF- $\kappa$ B reporter line, and induction of inflammatory cytokine  
511 expression, regardless of dexamethasone treatment. Our results demonstrate that excessive  
512 hyphal growth can override the suppression of NF- $\kappa$ B by dexamethasone.

513

514 Innate immune control of *A. fumigatus* varies with strain differences [26, 69]. In our experiments,  
515 we used spores derived from the CEA10 strain that was isolated from a patient [70]. CEA10-  
516 derived strains have relatively faster germination both *in vitro* and *in vivo* than spores of the  
517 other commonly studied AF293 strain [26, 71, 72]. As CEA10 is faster-germinating, resistance to  
518 infection with this strain in wild-type animals is more dependent on neutrophils and CEA10 is

519 susceptible to neutrophil-mediated killing *in vitro* and *in vivo* [26, 32, 65], consistent with the  
520 primary activity of dexamethasone in causing susceptibility being inhibition of neutrophil  
521 functions against invasive hyphal growth. It is currently unclear if the role of glucocorticoids in  
522 the pathogenesis of more slowly germinating strains, like AF293, is the same. AF293 spores can  
523 reside within macrophage clusters, which inhibit their germination, and therefore evade  
524 neutrophil-mediated killing and persist in the host for long time [26]. Therefore, it could be that  
525 in these infections, glucocorticoid-mediated inhibition of macrophage function plays a larger  
526 role.

527  
528 Glucocorticoid therapy is widely used in patients to decrease morbidity and mortality due to a  
529 variety of causes including transplant rejection and autoimmune disorders. However, a by-  
530 product of this therapy is increased susceptibility to infectious organisms, including fungi like  
531 *Aspergillus* spp. In order to better treat these opportunistic infections, it is important to fully  
532 understand the molecular and cellular mechanisms that are inhibited by glucocorticoid therapy  
533 that are the proximate cause of susceptibility to infection. Here, using a larval zebrafish host, we  
534 find that the major innate immune cell type inhibited by this therapy is neutrophils and that this  
535 inhibition allows for uncontrolled invasive hyphal growth in infected animals. However, the  
536 specific functions of neutrophils that are inhibited remain to be uncovered. In this model, NF- $\kappa$ B  
537 is the major molecular pathway inhibited by glucocorticoid treatment. However, the role of NF-  
538  $\kappa$ B in human infection is unclear, as the risk of invasive aspergillosis did not depend on single  
539 nucleotide polymorphisms (SNPs) of NF- $\kappa$ B and NF- $\kappa$ B pathway components in a cohort of  
540 hematopoietic stem-cell transplant patients [73], and the effect of glucocorticoids on other  
541 pathways should also be an area of future study.



## 542 **Materials and Methods**

### 543 **Ethics statement**

544 All experimental procedures of zebrafish embryos and larvae were performed, and adult  
545 zebrafish were maintained and handled, according to protocols approved by the Clemson  
546 University Institutional Animal Care and Use Committee (AUP2021-0109, AUP2022-0093,  
547 AUP2022-0111). Larvae were anesthetized using buffered tricaine prior to any experimental  
548 procedures. Larvae were euthanized at 4°C and adults were euthanized with buffered tricaine.

### 549 **Zebrafish lines and maintenance**

550 Adult zebrafish were maintained at 28°C at 14/10 hr light/dark cycles. All mutant and transgenic  
551 lines were maintained in the wild-type AB background, and are listed in Table 1. Embryos were  
552 collected after natural spawning, and were maintained in E3 medium with methylene blue at  
553 28°C. Embryos were manually dechorionated and anesthetized in 0.3 mg/mL buffered tricaine  
554 prior to any experimental procedures. Larvae used for imaging were treated with 200 µM N-  
555 phenylthiourea (PTU) starting from 24 hours post fertilization to inhibit pigment formation. All  
556 transgenic larvae were screened for fluorescent expression prior to infections. The *irf8* mutant  
557 adults were maintained as *irf8*<sup>+/-</sup> with additional transgenes expressing fluorescent markers in  
558 neutrophils (*Tg(mpx:mCherry)* or *Tg(lyzC:BFP)*). Larvae from *irf8*<sup>+/-</sup> in-crosses were screened  
559 for a high number of neutrophils to select for *irf8*<sup>-/-</sup> individuals prior to infections and larvae  
560 were genotyped after the experiments were concluded as previously described [45], using the  
561 primers F: 5' CAGGAGAGTTCAGTAAATTGAGC 3'; R: 5' CTTGTTTTCCCGCATGTTTCC  
562 3'.

563 **Table 1. Zebrafish lines used in this study.**

| Zebrafish line                                  | Reference  |
|-------------------------------------------------|------------|
| <i>irf8<sup>-/-</sup> / irf8<sup>st95</sup></i> | [45]       |
| <i>Tg(NF-κB RE:GFP)</i>                         | [37]       |
| <i>Tg(mpeg1:H2B-GFP)</i>                        | [74]       |
| <i>Tg(mpeg1:H2B-mCherry)</i>                    | [75]       |
| <i>Tg(lyz:BFP)</i>                              | [26]       |
| <i>Tg(mpx:mCherry-2A-rac2D57N)</i>              | [43]       |
| <i>Tg(mfap4:BFP)</i>                            | This study |

564

#### 565 **Generation of *Tg(mfap4:BFP)* fish line**

566 First, a clean Tol2 vector containing just the *mfap4* promoter was generated. Tol2-*mpx:mCherry-*  
567 *2A-rac2* [43] (a gift from Anna Huttenlocher) was cut with NheI and Sall (Promega) to remove  
568 the *mpx:mCherry-2A-rac2* insert. The *mfap4* promoter was then amplified from p5E-*mfap4*  
569 (Addgene #70052, a gift from David Tobin) for InFusion cloning (Takara Bio) into the digested  
570 Tol2 backbone (F: 5' GAAGTAAAAGGCTAGCGCGTTTCTTGGTACAGCTG 3' ; R: 5'  
571 TTCTAGATCAGTCGACCACGATCTAAAGTCATGAAG 3'). To generate Tol2-*mfap4:BFP*,  
572 *BFP* was amplified from Tol2-*lyz:BFP* [26] (a gift from Anna Huttenlocher) for HiFi cloning  
573 (NEB) into the Tol2-*mfap4* vector cut open with Sall (F: 5'  
574 TGACTTTAGATCGTGGTTCGACGGTACCTCGCCACCATGA 3' ; R: 5'  
575 CTATAGTTCTAGATCATCGACTCACTTGTGCCCCAGTTT 3').

576 For integration of *mfap4:BFP* into the zebrafish genome, *Tol2 transposase* was *in vitro*  
577 transcribed from NotI-digested (NEB) pCS2-*transposase* (a gift from Anna Huttenlocher) using  
578 an mMESSAGE mMACHINE SP6 kit according to the manufacturer's directions (Invitrogen).

579 mRNA was purified with a MEGAclear kit (Invitrogen). 1-3 nl of an injection mix containing 20  
580 ng/ $\mu$ l Tol2-*mfap4:BFP* plasmid and 10 ng/ $\mu$ l *transposase* mRNA was injected into the yolk of  
581 single cell embryos of the AB strain. Injected F0 embryos were grown to adulthood and a  
582 founder with integration of the DNA into the germline was determined by outcrossing single F0  
583 adults and screening for BFP expression.

584

### 585 ***Aspergillus fumigatus* strains and spore preparation for injections**

586 The CEA10 strain [70] and a CEA10-derived GFP-expressing TFYL49.1 strain [76] were used  
587 for non-imaging and imaging experiments, respectively. These strains are equivalent in  
588 pathogenesis in zebrafish larvae [26]. Spores were prepared as previously described [27]. Briefly,  
589  $10^6$  spores were spread on 10 cm plates with solid glucose minimal media (GMM) and were  
590 incubated at 37°C for 4 days. Spores were collected into sterile water with 0.01% Tween by  
591 scraping using a L spreader and were filtered through sterile miracloth (Sigma-Aldrich) into a 50  
592 mL centrifuge tube. Spores were pelleted by centrifugation at 900 g for 10 mins, washed in  
593 sterile PBS, pelleted again, and finally resuspended in 5 mL of sterile PBS. This suspension was  
594 again filtered through miracloth into a new 50 mL tube. The spore concentration was determined  
595 using a hemocytometer and a suspension at  $1.5 \times 10^8$ /mL was made in PBS and stored at 4°C  
596 for up to ~6 weeks.

597

### 598 ***In vitro* fungal growth assay**

599 10 cm solid GMM plates containing 20 mL GMM agar with 10  $\mu$ M dexamethasone or 0.01%  
600 DMSO vehicle control were prepared and stored at 4°C for up to ~4 months. Spores of the GFP-  
601 expressing TFYL49.1 strain were prepared as described above and resuspended at  $10^7$ /mL and

602 stored at 4°C for up to ~6 weeks. 2 µL was dispensed into the middle of the plate and plates were  
603 incubated at 37°C for 4 days. To quantify the growth in each condition, the diameter of the  
604 colony was measured daily. To quantify branching of the growing hyphae, at 2 days post culture,  
605 a piece of agar from the edge of each colony was cut out and placed on a glass slide and flattened  
606 using a coverslip. Hyphae in this piece were imaged using a confocal microscope, as described  
607 below. This experiment was repeated twice with three plates/condition/experiment. One slide per  
608 plate was used for imaging, and four microscopic fields were captured for each slide.

609

### 610 **Live-dead spore labeling**

611 Spores of the GFP-expressing TFYL49.1 strain were stained with AlexaFluor546 as described  
612 previously [39, 77, 78]. Briefly, spores were incubated on a shaker with 0.5 mg/mL of biotin-XX,  
613 SSE (Molecular Probes) in 0.05M NaHCO<sub>3</sub> at 4°C for 2 hrs. Spores were pelleted by  
614 centrifugation and washed twice with 100 mM Tris-HCl (pH 8.0) on a shaker at 4°C for 30 min  
615 to deactivate free-floating biotin. Spores were washed with 1X PBS twice. Spores were then  
616 resuspended in 1X PBS containing 20 µg/mL of streptavidin-AlexaFluor546 (Invitrogen) and  
617 incubated for 40 min at room temperature. Stained spores were then pelleted and resuspended in  
618 1X PBS, spore concentration was enumerated, and a spore suspension was made at 1.5 X 10<sup>8</sup>/  
619 mL and stored at 4°C for up to ~4 weeks.

620

### 621 **Zebrafish hindbrain microinjections**

622 *A. fumigatus* spores were injected into the hindbrain ventricle of 2 days post fertilization (dpf)  
623 larvae as described previously [36]. The prepared 1.5 X 10<sup>8</sup>/ mL spore suspension was mixed at  
624 2:1 with filter-sterilized phenol red to achieve a final concentration of 1 X 10<sup>8</sup>/ mL. Injection

625 plates made of 2% agarose in E3 were coated with 2% filter-sterilized bovine serum albumin  
626 (BSA) to prevent larvae sticking to the agarose. Dechorionated and anesthetized 2 dpf larvae  
627 were transferred to and aligned on the injection plate. A microinjection setup supplied with  
628 pressure injector, micromanipulator, micropipet holder, footswitch, and back pressure unit  
629 (Applied Scientific Instrumentation) was used to inject 30-50 spores into individual larvae.  
630 Actual injection doses were monitored by CFU plating as described below and are reported in  
631 each figure legend. PBS mixed with phenol red was used as a mock infection control. Injected  
632 larvae were then rinsed at least twice with E3 without methylene blue to remove tricaine and any  
633 free spores. For imaging experiments, larvae were returned to E3 containing 200  $\mu$ M PTU.  
634 Larvae were transferred to 96-well plates for survival and CFU experiments, 48-well plates for  
635 daily imaging experiments, or 6-well plates for RNA extraction and single day imaging  
636 experiments.

637

### 638 **Morpholino injections**

639 A stock solution of *pu.1* (*spi1b*) morpholino oligonucleotide (MO) (*ZFIN* MO1-*spi1b*: 5'  
640 GATATACTGATACTCCATTGGTGGT 3') (GeneTools) was made by resuspension in water to  
641 1 mM and stored at 4°C [41, 79]. For injections, the stock was diluted in water with 0.5X  
642 CutSmart Buffer (New England Biolabs) and 0.1% filter-sterilized phenol red. We used 2  
643 different concentrations of *pu.1* MO: low-dose 0.05 mM to prevent development of macrophages  
644 [44] or high-dose 0.5 mM to prevent development of both macrophages and neutrophils [41].  
645 Optimization of low-dose *pu.1* MO to only inhibit macrophage development is mentioned below.  
646 A standard control MO at matching concentrations was used as a control. 3 nL of the injection  
647 mix was injected into the yolk of 1-2 cell stage embryos. Efficacy of 0.5 mM *pu.1* knockdown

648 was determined by injection into embryos of macrophage- (*Tg(mpeg1:H2B-GFP)*) and  
649 neutrophil-labeled (*Tg(mpx:mCherry)*) zebrafish lines and larvae were screened for the loss of  
650 fluorescent signal using a fluorescent zoomscope (Zeiss SteREO Discovery.V12 PentaFluar with  
651 Achromat S 1.0x objective) prior to *A. fumigatus* infections. To identify a low concentration of  
652 *pu.1* MO that only inhibits macrophage development but not neutrophil development, multiple  
653 different concentrations ranging from 0.05 mM to 0.5 mM were tested. Embryos of macrophage-  
654 labeled (*Tg(mpeg1:H2B-GFP)*) and neutrophil-labeled (*Tg(mpx:mCherry)*) zebrafish lines were  
655 injected with increasing concentrations of *pu.1* MO and larvae at 2 dpf were screened for the loss  
656 of GFP signal but intact mCherry signal using a fluorescent zoomscope (Zeiss SteREO  
657 Discovery.V12 PentaFluar with Achromat S 1.0x objective). To further test if neutrophils are  
658 still active with low-dose *pu.1* MO injections, we performed a tail wounding experiment as  
659 previously described [80]. Briefly, the tails of the larvae injected with 0.05 mM *pu.1* or control  
660 MO were transected using a no.10 Feather surgical blade (GF Health Products) and the larvae  
661 were confocal imaged (as described in the Live Imaging section) at 2 hours post wounding. The  
662 number of neutrophils at the wounding site was enumerated. 6 larvae were used for each  
663 condition, and the experiment was done once.

664

### 665 **CRISPR gRNA design and injections**

666 For each target gene, two guide RNAs (gRNA) were designed to bind to regions of the coding  
667 sequence that are required for the function of the protein and in which the translated amino acid  
668 sequence is conserved with the human protein. gRNA targets were identified with the  
669 CHOPCHOP web-based program [81-83]. gRNA sequences are listed in Table 2. To generate  
670 DNA templates for *in vitro* transcription of gRNAs, gene-specific oligo sequences were

671 generated containing a T7 promoter (5'-TAATACGACTCACTATAG-3'), the target sequence,  
672 and an overlap region to pair with a constant oligo encoding the reverse complement of the Cas9  
673 binding sequence (Integrated DNA Technologies)(constant oligo (5'-  
674 AAAAGCACCGACTCGGTGCCACTTTTTCAAGTTGATAACGGACTAGCCTTATTTTAA  
675 CTTGC TATTTCTAGCTCTAAAAC -3')). Gene-specific and constant oligos were annealed  
676 and T4 DNA polymerase (New England Biolabs) was added to generate the DNA template.  
677 Purified template was *in vitro* transcribed using T7 RNA polymerase (New England Biolabs),  
678 treated with DNase I (New England Biolabs), and purified using a Monarch RNA cleanup kit  
679 (New England Biolabs). Embryos were injected with both gRNAs targeting a single gene. An  
680 injection mix containing 75 ng/μL of each gRNA and 250 ng/μL Cas9 protein (PNA Bio) was  
681 used. Two control gRNAs targeting *luciferase (luc)* at matching concentrations were used as the  
682 control. 1-2 nL of injection mix was injected into the yolk of 1-cell stage embryos. Genomic  
683 DNA from individual larvae was extracted at 2 dpf in 50 mM NaOH at 95°C. The efficacy of  
684 gRNAs were tested by PCR using primers flanking the target sequence. We used two sets of  
685 PCR, one with primers flanking an individual target site (F1R1 or F2R2) and with primers  
686 flanking the two target sequences (F1R2) as shown in S2 and S7 Figs. For *ikbkg1+2*-injected  
687 larvae, a separate primer pair flanking the two target sites with matching T<sub>m</sub> was designed  
688 (F3R3). The primers used are listed in Table 3. The PCR products were run on a 2.5% agarose  
689 gel to visualize alterations of genomic DNA as shown in S2 and S7 Figs.

690

691 **Table 2. CRISPR gRNAs.**

| gene         | gRNA | gRNA sequence (5' – 3') |
|--------------|------|-------------------------|
| <i>ikbkg</i> | 1    | ATATTGCAGAGTGCAGCCAC    |

|                   |   |                       |
|-------------------|---|-----------------------|
|                   | 2 | TCCCTGCTTGACTGACACTC  |
| <i>nr3c1</i>      | 1 | ACCCAAAGTGAAGGGGACCA  |
|                   | 2 | ATTTGCGGAAACGACAGGCA  |
| <i>luciferase</i> | 1 | TTGGAAACGAACACCACGGT  |
|                   | 2 | ACAAC TTTACCGACCGCGCC |

692

693 **Table 3. Primers used to test successful alteration of DNA.**

| gRNA                     | Primers used for PCR | Primer sequence (5' – 3') |
|--------------------------|----------------------|---------------------------|
| <i>ikbkg-1</i>           | F1                   | CAATGCGGTCTTTTGTGTG       |
|                          | R1                   | TTCTGAACCTGCGGTCTCTT      |
| <i>ikbkg-2</i>           | F2                   | AGATTCGTGAGGCCAGAGA       |
|                          | R2                   | TTGGTGCACCTCAGCTCTTG      |
| <i>ikbkg-1 + ikbkg-2</i> | F3                   | GCACTGCAGTAGTCTTGGTGA     |
|                          | R3                   | AGTGTCTCCTTCAGCGCATT      |
| <i>nr3c1-1</i>           | F1                   | CTCAAAC T GCTTGGGAAGGA    |
|                          | R1                   | GGGGTTGTTAAGGTCTGCAA      |
| <i>nr3c1-2</i>           | F2                   | ACGATTGCATCATTGACAAAA     |
|                          | R2                   | TGCAAGATTTTCATGTTACCCTCT  |

694

### 695 **Clodronate liposome injections**

696 Larvae expressing GFP in macrophages (*Tg(mpeg1:H2B-GFP)*) were manually dechorionated at  
 697 1 dpf. Clodronate or PBS liposomes (Liposoma) were stored at 4°C. Prior to injections, 10% of  
 698 volume of filter-sterilized phenol red was added to the liposomes and 2 nL was i.v. injected into



699 the caudal vein plexus of larvae. To confirm macrophage depletion, larvae were screened for the  
700 loss of GFP signal using a fluorescent zoomscope (Zeiss SteREO Discovery.V12 PentaFluar  
701 with Achromat S 1.0x objective) prior to *A. fumigatus* infection at 2 dpf.

702

### 703 **Drug treatments**

704 Infected larvae were exposed to dexamethasone (Sigma-Aldrich) at 10  $\mu$ M, a concentration  
705 which was previously used in zebrafish larvae [26]. A 1000X 10 mM stock was prepared in  
706 DMSO and 0.1% DMSO was used as the vehicle control. Directly after injection, E3 was  
707 removed from dishes containing larvae and new E3 with pre-mixed dexamethasone or DMSO  
708 was added. Larvae were kept in the same solution for the entirety of the experiment. For daily  
709 imaging experiments, larvae were pipetted out of the drug treatment, imaged, and were  
710 transferred back into the same drug solution.

711

### 712 **CFU counts**

713 Single larvae were transferred to 1.7 mL microcentrifuge tubes into 90  $\mu$ L of PBS containing 1  
714 mg/mL ampicillin and 0.5 mg/mL of kanamycin. Larvae were euthanized at 4°C overnight and  
715 homogenized with a tissue lyser (Qiagen) at 1800 oscillations/min (30 Hz) for 6 mins. The  
716 suspension was then centrifuged at 17000 g for 30 seconds, resuspended by pipetting, and spread  
717 on a GMM plate. Plates were incubated at 37°C for 3 days and the number of colonies were  
718 counted. For survival experiments, 8 larvae for each condition were collected and euthanized  
719 immediately after injections, and were plated the next day to enumerate the actual injection dose.  
720 To monitor the fungal burden across multiple days, 8 larvae/condition/day were plated and CFU  
721 counts were normalized to the initial injection dose for each condition.

722

### 723 **RNA extraction and RT-qPCR**

724 To quantify cytokine gene expression, larvae were infected with TFYL49.1 spores and exposed  
725 to dexamethasone or DMSO. At 1 or 2 dpi, infected larvae were anesthetized and screened using  
726 a Zeiss Cell Observer Spinning Disk confocal microscope to split larvae into groups based on the  
727 presence of germinated spores. From this screening, the pooled no germination group contained  
728 20 larvae and the pooled germination group contained 1-3 larvae per replicate. 500 ng of RNA  
729 was used for cDNA synthesis. To quantify *ikbbk* expression in wild-type larvae, larvae were  
730 injected with CEA10 spores or PBS and were exposed to dexamethasone or DMSO. 20 pooled  
731 larvae for each condition per replicate at 1 or 2 dpi were used for RNA extraction. 1000 ng of  
732 RNA was used for cDNA synthesis. To test *ikbbk* expression in glucocorticoid receptor targeted  
733 larvae, *nr3c1* crispant or control larvae were exposed to dexamethasone or DMSO at 2 dpf. At 1  
734 day post treatment (dpt), 20 pooled larvae from each condition per replicate were used for RNA  
735 extraction. 1000 ng of RNA was used for cDNA synthesis.

736

737 For RNA extraction, anesthetized larvae were transferred to a 1.7 mL microcentrifuge tube  
738 homogenized in 500  $\mu$ L TRIzol (Invitrogen) on a disruptor genie for 10 minutes. RNA was  
739 extracted following the manufacturer's instructions, using 4  $\mu$ g of glycogen as a carrier. cDNA  
740 synthesis was done with iScript RT Supermix with oligo dT (Bio-Rad). cDNA was diluted 1:10  
741 and 4  $\mu$ L of diluted cDNA was used for qPCR in a 10  $\mu$ L reaction, using SYBR Green Supermix  
742 (Bio-Rad) and primers listed in S1 Table. Fold change was calculated with the  $\Delta\Delta C_q$  method,  
743 using *rps11* as the house-keeping gene [84] and three independent replicates were performed for  
744 each RT-qPCR.

745

## 746 **Live imaging**

747 Fluorescent positive larvae were screened on using a fluorescent zoomscope (Zeiss SteREO

748 Discovery.V12 PentaFluar with Achromat S 1.0x objective) prior to *A. fumigatus* infections.

749 Larvae were imaged using a Zeiss Cell Observer Spinning Disk confocal microscope on a Axio

750 Observer 7 microscope stand with a confocal scanhead (Yokogawa CSU-X) and a Photometrics

751 Evolve 512 EMCCD camera. A Plan-Apochromat 20X (0.8 NA) or an EC Plan-Neofluar 40X

752 (0.75 NA) objective and ZEN software were used to acquire Z-stack images of the hindbrain area

753 with 2.5 or 5  $\mu\text{m}$  distance between slices. For daily imaging experiments, larvae were pipetted

754 out of 48-well plates one at a time, anesthetized in tricaine, and transferred to a zWEDGI device

755 [85, 86]. After imaging, larvae were rinsed in E3 with 200  $\mu\text{M}$  PTU and transferred back into the

756 original wells into the same drug solution. For single time point imaging, larvae were

757 anesthetized in 6-well plates and were transferred to and imaged in a zWEDGI device [85, 86].

758 For experiments in the *irf8* mutant line, genomic DNA was isolated from whole larvae in 50 mM

759 NaOH for genotyping when larvae were euthanized due to increased fungal growth or

760 immediately after completion of imaging.

761

## 762 **Image analysis**

763 All image analysis was performed blinded and with Image J/Fiji [87]. For any analysis where

764 fluorescent intensity was quantified, images were not processed prior to analysis. To quantify the

765 GFP signal from the *NF- $\kappa$ B RE:GFP* zebrafish line, the hindbrain area was manually identified

766 using the polygon selection tool from the corresponding bright field image. The GFP signal was

767 quantified within the identified area using maximum intensity projection of six z-slices

768 containing *A. fumigatus* spores or hyphae. The displayed images show signal intensity with the  
769 16 colors lookup table. To quantify phagocyte recruitment, images were processed with bilinear  
770 interpolation to increase pixel density two-fold prior to counting and the number of phagocytes  
771 and/or the phagocyte cluster area were quantified. Phagocyte numbers were manually counted  
772 across z-stacks using the Cell Counter plugin. Macrophage cluster area was measured in  
773 maximum intensity projections using the polygon selection tool. Displayed images were  
774 processed with bilinear interpolation to increase pixel density two-fold and maximum intensity  
775 projections of merged z-stacks were used. For live-dead staining, images were processed with  
776 bilinear interpolation to increase pixel density two-fold and live versus dead spores were counted  
777 using the Cell Counter plugin. The displayed images of live versus dead spores show a merged z-  
778 projection of 3 slices and were processed with gaussian blur (radius = 1) in Fiji to reduce noise.  
779 Fungal growth was manually categorized as germination or invasive hyphae. Any hyphal growth  
780 (branched or not) was considered an incidence of germination and the presence of branched  
781 hyphae was considered an incidence of invasive growth. 2D fungal area was measured by  
782 thresholding the fluorescent intensity from maximum intensity projections. To generate the  
783 heatmap of fungal growth, the severity was scored using pre-determined categories [39]. The  
784 scoring was: 0 – no germination, 1 – at least one event of germination, 2 – at least one event of  
785 branched hyphae, but hyphae restricted to the infection site, 3 – at least one event of branched  
786 hyphae, but hyphae spreading in the hindbrain ventricle, 4 – hyphae invading into nearby tissue,  
787 and 5 – lethal. Representative images of each category are shown in S4 Fig. Maximum intensity  
788 projection of z-stacks was used for the displayed images. The same experiment and the same  
789 images were used to enumerate the number of phagocytes and fungal growth. For *irf8*<sup>-/-</sup> larvae  
790 imaging experiments, neutrophil cluster area was measured from maximum intensity projections

791 using the polygon selection tool. Maximum intensity projections of z-stacks were used for the  
792 displayed images. For the *in vitro* assay images, the fungal area was measured by quantifying  
793 GFP signal by thresholding the fluorescent intensity from the maximum intensity projection of  
794 all slices. The number of nodes/branching points were manually counted using the Cell Counter  
795 plugin.

796

### 797 **Statistical analysis**

798 For all experiments, unless stated otherwise, pooled data from at least three independent  
799 replicates were generated and the total Ns are given in each figure. R version 4.1.0 was used for  
800 statistical analysis and GraphPad Prism version 10 (GraphPad Software) was used to generate  
801 graphs. Larval survival data and the cumulative percentage of larvae with fungal germination or  
802 invasive hyphae were analyzed by Cox proportional hazard regression to calculate P values and  
803 hazard ratios (HR). HR reports the likelihood of larvae succumbing to the infection in a  
804 particular condition as compared to the control. The statistical analysis considers variability  
805 within and between replicates to calculate the P values. Fluorescent intensity, phagocyte numbers  
806 and cluster area, fungal area, CFU counts, live-dead imaging analysis, and day of germination or  
807 invasive hyphae were analyzed with analysis of variance (ANOVA). For each condition,  
808 estimated marginal means (emmeans) and standard error (SEM) were calculated and pairwise  
809 comparisons were performed with Tukey's adjustment. The statistical analysis considers  
810 variability within and between replicates to calculate the P values. The graphs for these analyses  
811 show values from individual larvae over time as individual lines or points in dot plots, and bars  
812 represent pooled emmeans  $\pm$  SEM. The points in dot plots are color-coded by replicate. For RT-  
813 qPCR, the fold change was analyzed by t-test in Excel. For *in vitro* data, the radius of the

814 colonies and the number of nodes normalized to the fungal area were compared by t-test in  
815 Excel. In the dot plot, each dot represents an individual plate, and the dots are color-coded by  
816 replicate.

## 817 **Acknowledgements**

818 We thank Celia Shiau for providing the *irf8* mutant zebrafish line. We thank Anna Huttenlocher  
819 for sharing all other transgenic lines. We thank Sourabh Dhingra for helping to design the *A.*  
820 *fumigatus in vitro* assay. We thank all the members of the Rosowski Lab for helpful discussions.

## 821 **References**

- 822 1. Cain DW, Cidlowski JA. Immune regulation by glucocorticoids. Nature reviews. Immunology.  
823 2017;17(4):233-47.
- 824 2. Rhen T, Cidlowski JA. Antiinflammatory Action of Glucocorticoids -- New Mechanisms for  
825 Old Drugs. The New England Journal of Medicine. 2005;353(16):1711-23.
- 826 3. Oakley RH, Cidlowski JA. The biology of the glucocorticoid receptor: New signaling  
827 mechanisms in health and disease. Journal of allergy and clinical immunology.  
828 2013;132(5):1033-44.
- 829 4. Yasir M, Amandeep G, Pankaj B & Sidharth S. Corticosteroid Adverse Effects. In StatPearls.  
830 Treasure Island, FL, USA; 2022.
- 831 5. Latgé J. *Aspergillus fumigatus* and Aspergillosis. 1999;12(2):310.
- 832 6. Lionakis MS, Kontoyiannis DP. Glucocorticoids and invasive fungal infections. The Lancet  
833 (British edition). 2003;362(9398):1828-38.
- 834 7. Baddley JW. Clinical risk factors for invasive aspergillosis. Medical mycology.  
835 2011;49(S1):S7-S12.
- 836 8. Lin S, Schranz J, Teutsch SM. Aspergillosis Case-Fatality Rate: Systematic Review of the  
837 Literature. Clinical Infectious Diseases. 2001;32(3):358-66.
- 838 9. Nissen RM, Yamamoto KR. The glucocorticoid receptor inhibits NFκB by interfering with  
839 serine-2 phosphorylation of the RNA polymerase II carboxy-terminal domain. Genes &  
840 development. 2000;14(18):2314-29.

- 841 10. Ray A, Prefontaine KE. Physical association and functional antagonism between the p65  
842 subunit of transcription factor NF- $\kappa$ B and the glucocorticoid receptor. *Biochemistry*.  
843 1994;91:752.
- 844 11. Caldenhoven E. Negative cross-talk between RelA and the glucocorticoid receptor: a possible  
845 mechanism for the antiinflammatory action of glucocorticoids. *Molecular endocrinology*.  
846 1995;9(4):401-12.
- 847 12. Liu T, Zhang L, Joo D, Sun S. NF- $\kappa$ B signaling in inflammation. *Sig Transduct Target Ther*.  
848 2017;2(1).
- 849 13. Baeuerle PA BD. IKK: A specific inhibitor of the NF $\kappa$ B transcription factor. *Science*.  
850 1988;242(4878):540-6.
- 851 14. Henkel T, Zabel U, van Zee K, Müller JM, Fanning E, Baeuerle PA. Intramolecular masking of  
852 the nuclear location signal and dimerization domain in the precursor for the p50 NF- $\kappa$ B  
853 subunit. *Cell*. 1992;68(6):1121-33.
- 854 15. Beg AA, Ruben SM, Scheinman RI, Haskill S, Rosen CA, Baldwin AS. I kappa B interacts  
855 with the nuclear localization sequences of the subunits of NF-kappa B: a mechanism for  
856 cytoplasmic retention. *Genes & development*. 1992;6(10):1899-913.
- 857 16. Arenzana-Seisdedos F, Turpin P, Rodriguez M, Thomas D, Hay RT, Virelizier JL, et al.  
858 Nuclear localization of I kappa B alpha promotes active transport of NF-kappa B from the  
859 nucleus to the cytoplasm. *Journal of Cell Science*. 1997;110(3):369-78.
- 860 17. Ghosh S, May MJ, Kopp EB. NF- $\kappa$ B and Rel proteins: Evolutionarily Conserved Mediators of  
861 Immune Responses. *Annual review of immunology*. 1998;16(1):225-60.
- 862 18. Vallabhapurapu S, Karin M. Regulation and Function of NF- $\kappa$ B Transcription Factors in the  
863 Immune System. *Annual Review of Immunology*. 2009;27(1):693-733.
- 864 19. Karin M, Ben-Neriah Y. Phosphorylation Meets Ubiquitination: The Control of NF- $\kappa$ B  
865 Activity. *Annual review of immunology*. 2000;18(1):621-63.
- 866 20. Israel A. The IKK Complex, a Central Regulator of NF- B Activation. *Cold Spring Harbor*  
867 *perspectives in biology*. 2010;2(3):a000158.
- 868 21. Auphan N, DiDonato JA, Rosette C, Helmborg A, Karin M. Immunosuppression by  
869 glucocorticoids: inhibition of NF-kappaB activity through induction of IkappaB synthesis.  
870 *Science*. 1995;270(5234):286.
- 871 22. Scheinman RI, Cogswell PC, Lofquist AK, Baldwin AS. Role of Transcriptional Activation of  
872 I $\kappa$ B $\alpha$  in Mediation of Immunosuppression by Glucocorticoids. *Science*. 1995;270(5234):283-6.
- 873 23. Heck S, Bender K, Kullmann M, Göttlicher M, Herrlich P, Cato ACB. I $\kappa$ B $\alpha$ -independent  
874 downregulation of NF- $\kappa$ B activity by glucocorticoid receptor. *The EMBO journal*.  
875 1997;16(15):4698-707.
- 876 24. Inoue K, Koike E, Yanagisawa R, Adachi Y, Ishibashi K, Ohno N, et al. Pulmonary Exposure  
877 to Soluble Cell Wall  $\beta$ (1, 3)-Glucan of *Aspergillus* Induces Proinflammatory Response in Mice.  
878 *International journal of immunopathology and pharmacology*. 2009;22(2):287-97.



- 879 25. Sun H, Xu X, Tian X, Shao H, Wu X, Wang Q, et al. Activation of NF- $\kappa$ B and respiratory  
880 burst following *Aspergillus fumigatus* stimulation of macrophages. *Immunobiology* (1979).  
881 2014;219(1):25-36.
- 882 26. Rosowski EE, Raffa N, Knox BP, Golenberg N, Keller NP, Huttenlocher A. Macrophages  
883 inhibit *Aspergillus fumigatus* germination and neutrophil-mediated fungal killing. *PLoS*  
884 *Pathog*. 2018;14(8).
- 885 27. Knox BP, Deng Q, Rood M, Eickhoff JC, Keller NP, Huttenlocher A. Distinct innate immune  
886 phagocyte responses to *Aspergillus fumigatus* conidia and hyphae in zebrafish larvae.  
887 *Eukaryotic cell*. 2014;13(10):1266-77.
- 888 28. Rosowski EE. Determining macrophage versus neutrophil contributions to innate immunity  
889 using larval zebrafish. *Disease models & mechanisms*. 2020;13(1):dmm041889.
- 890 29. Knox BP, Huttenlocher A, Keller NP. Real-time visualization of immune cell clearance of  
891 *Aspergillus fumigatus* spores and hyphae. *Fungal genetics and biology*. 2017;105:52-4.
- 892 30. Gazendam RP, van Hamme JL, Tool ATJ, Hoogenboezem M, van den Berg JM, Prins JM, et  
893 al. Human Neutrophils Use Different Mechanisms To Kill *Aspergillus fumigatus* Conidia and  
894 Hyphae: Evidence from Phagocyte Defects. *The Journal of immunology* (1950).  
895 2016;196(3):1272-83.
- 896 31. Philippe B, Ibrahim-Granet O, Prevost MC, Gougerpot-Pocidal MA, Sanchez Perez M, Van  
897 Der Meeren A, et al. Killing of *Aspergillus fumigatus* by Alveolar Macrophages Is Mediated  
898 by Reactive Oxidant Intermediates. *Infection and Immunity*. 2003;71(6):3034-42.
- 899 32. Schaffner A, Douglas H, Braude A. Selective protection against conidia by mononuclear and  
900 against mycelia by polymorphonuclear phagocytes in resistance to *Aspergillus*. Observations  
901 on these two lines of defense in vivo and in vitro with human and mouse phagocytes. *The*  
902 *Journal of clinical investigation*. 1982;69(3):617-31.
- 903 33. Dagenais TRT, Keller NP. Pathogenesis of *Aspergillus fumigatus* in Invasive Aspergillosis.  
904 *Clinical Microbiology Reviews*. 2009;22(3):447-65.
- 905 34. Traver D, Herbomel P, Patton EE, Murphey RD, Yoder JA, Litman GW, et al. The Zebrafish  
906 as a Model Organism to Study Development of the Immune System. *Advances in*  
907 *Immunology*. 2003;81:254-330.
- 908 35. Gomes MC, Mostowy S. The Case for Modeling Human Infection in Zebrafish. *Trends*  
909 *Microbiol*. 2020;28(1):10-8.
- 910 36. Thrikawala S, Rosowski EE. Infection of Zebrafish Larvae with *Aspergillus* Spores for  
911 Analysis of Host-Pathogen Interactions. *J Vis Exp*. 2020;(159). doi(159):10.3791/611165.
- 912 37. Kanther M, Sun X, Mühlbauer M, Mackey LC, Flynn EJ, Bagnat M, et al. Microbial  
913 Colonization Induces Dynamic Temporal and Spatial Patterns of NF- $\kappa$ B Activation in the  
914 Zebrafish Digestive Tract. *Gastroenterology*. 2011;141(1):197-207.
- 915 38. Rhen T, Cidlowski JA. Antiinflammatory Action of Glucocorticoids -- New Mechanisms for  
916 Old Drugs. *The New England Journal of Medicine*. 2005;353(16):1711-23.



- 917 39. Thrikawala S, Niu M, Keller NP, Rosowski EE. Cyclooxygenase production of PGE2  
918 promotes phagocyte control of *A. fumigatus* hyphal growth in larval zebrafish. *PLoS Pathog.*  
919 2022;18(3):e1010040.
- 920 40. Ibrahim-Granet O, Philippe B, Boleti H, Boisvieux-Ulrich E, Grenet D, Stern M, et al.  
921 Phagocytosis and Intracellular Fate of *Aspergillus fumigatus* Conidia in Alveolar  
922 Macrophages. *Infection and Immunity.* 2003;71(2):891-903.
- 923 41. Rhodes J, Hagen A, Hsu K, Deng M, Liu TX, Look AT, et al. Interplay of Pu.1 and Gata1  
924 Determines Myelo-Erythroid Progenitor Cell Fate in Zebrafish. *Developmental Cell.*  
925 2005;8(1):97-108.
- 926 42. Rosowski EE, He J, Huisken J, Keller NP, Huttenlocher A. Efficacy of Voriconazole against  
927 *Aspergillus fumigatus* Infection Depends on Host Immune Function. *Antimicrob Agents*  
928 *Chemother.* 2020;64(2).
- 929 43. Deng Q, Yoo S, Cavnar P, Green J, Huttenlocher A. Dual Roles for Rac2 in Neutrophil  
930 Motility and Active Retention in Zebrafish Hematopoietic Tissue. *Developmental cell.*  
931 2011;21(4):735-45.
- 932 44. Mesureur J, Feliciano JR, Wagner N, Gomes MC, Zhang L, Blanco-Gonzalez M, et al.  
933 Macrophages, but not neutrophils, are critical for proliferation of *Burkholderia cenocepacia*  
934 and ensuing host-damaging inflammation. *PLoS Pathogens.* 2017;13(12).
- 935 45. Shiau CE, Kaufman Z, Meireles AM, Talbot WS. Differential Requirement for *irf8* in  
936 Formation of Embryonic and Adult Macrophages in Zebrafish. *PLoS ONE.*  
937 2015;10(1):e0117513.
- 938 46. Kousha M, Tadi R, Soubani AO. Pulmonary aspergillosis: a clinical review. *European*  
939 *respiratory review.* 2011;20(121):156-74.
- 940 47. Okaa UJ, Bertuzzi M, Fortune-Grant R, Thomson DD, Moyes DL, Naglik JR, et al. *Aspergillus*  
941 *fumigatus* Drives Tissue Damage via Iterative Assaults upon Mucosal Integrity and Immune  
942 Homeostasis. *Infect Immun.* 2023;91(2):e0033322.
- 943 48. Cole TJ, Blendy JA, Monaghan AP, Krieglstein K, Schmid W, Aguzzi A, et al. Targeted  
944 disruption of the glucocorticoid receptor gene blocks adrenergic chromaffin cell development  
945 and severely retards lung maturation. *Genes & development.* 1995;9(13):1608-21.
- 946 49. Rudolph D, Yeh WC, Wakeham A, Rudolph B, Nallainathan D, Potter J, et al. Severe liver  
947 degeneration and lack of NF-kappaB activation in NEMO/IKKgamma-deficient mice. *Genes &*  
948 *development.* 2000;14(7):854-62.
- 949 50. Yang-Yen H, Chambard J, Sun Y, Smeal T, Schmidt TJ, Drouin J, et al. Transcriptional  
950 interference between c-Jun and the glucocorticoid receptor: Mutual inhibition of DNA binding  
951 due to direct protein-protein interaction. *Cell.* 1990;62(6):1205-15.
- 952 51. Toyotome T, Adachi Y, Watanabe A, Ochiai E, Ohno N, Kamei K. Activator protein 1 is  
953 triggered by *Aspergillus fumigatus*  $\beta$ -glucans surface-exposed during specific growth stages.  
954 *Microbial pathogenesis.* 2008;44(2):141-50.
- 955 52. Nicholson WJ, Slight J, Donaldson K. Inhibition of the transcription factors NF-kappa B and  
956 AP-1 underlies loss of cytokine gene expression in rat alveolar macrophages treated with a

- 957 diffusible product from the spores of *Aspergillus fumigatus*. *American journal of respiratory*  
958 *cell and molecular biology*. 1996;15(1):88-96.
- 959 53. Romani L. Immunity to fungal infections. *Nature reviews immunology*. 2011;11(4):275-88.
- 960 54. Bonnett CR, Cornish EJ, Harmsen AG, Burritt JB. Early Neutrophil Recruitment and  
961 Aggregation in the Murine Lung Inhibit Germination of *Aspergillus fumigatus* Conidia.  
962 *Infection and Immunity*. 2006;74(12):6528-39.
- 963 55. Lewis RE, Kontoyiannis DP. Invasive aspergillosis in glucocorticoid-treated patients. *Medical*  
964 *mycology*. 2009;47(S1):S271-81.
- 965 56. Kyrmizi I, Gresnigt MS, Akoumianaki T, Samonis G, Sidiropoulos P, Boumpas D, et al.  
966 Corticosteroids Block Autophagy Protein Recruitment in *Aspergillus fumigatus* Phagosomes  
967 via Targeting Dectin-1/Syk Kinase Signaling. *Journal of Immunology*. 2013;191(3):1287-99.
- 968 57. Luvanda MK, Posch W, Vosper J, Zaderer V, Noureen A, Lass-Flörl C, et al. Dexamethasone  
969 Promotes *Aspergillus fumigatus* Growth in Macrophages by Triggering M2 Repolarization via  
970 Targeting PKM2. *Journal of fungi*. 2021;7(2):70.
- 971 58. Merkow L, Pardo M, Epstein SM, Verney E, Sidransky H. Lysosomal Stability during  
972 Phagocytosis of *Aspergillus flavus* Spores by Alveolar Macrophages of Cortisone-Treated  
973 Mice. *Science*. 1968;160(3823):79-81.
- 974 59. Berenguer J, Allende MC, Lee JW, Garrett K, Lyman C, Ali NM, et al. Pathogenesis of  
975 pulmonary aspergillosis. Granulocytopenia versus cyclosporine and methylprednisolone-  
976 induced immunosuppression. *American Journal of Respiratory and Critical Care Medicine*.  
977 1995;152(3):1079-86.
- 978 60. Segal AW. How neutrophils kill microbes. *Annual Review of Immunology*. 2005;23(1):197-  
979 223.
- 980 61. McCormick A, Heesemann L, Wagener J, Marcos V, Hartl D, Loeffler J, et al. NETs formed  
981 by human neutrophils inhibit growth of the pathogenic mold *Aspergillus fumigatus*. *Microbes*  
982 *and infection*. 2010;12(12-13):928-36.
- 983 62. Röhm M, Grimm MJ, D'Auria AC, Almyroudis NG, Segal BH, Urban CF. NADPH Oxidase  
984 Promotes Neutrophil Extracellular Trap Formation in Pulmonary Aspergillosis. *Infection and*  
985 *immunity*. 2014;82(5):1766-77.
- 986 63. Bruns S, Kniemeyer O, Hasenberg M, Amanianda V, Nietzsche S, Thywissen A, et al.  
987 Production of Extracellular Traps against *Aspergillus fumigatus* In Vitro and in Infected Lung  
988 Tissue Is Dependent on Invading Neutrophils and Influenced by Hydrophobin RodA. *PLoS*  
989 *Pathogens*. 2010;6(4):e1000873.
- 990 64. Roilides E, Uhlig K, Venzon D, Pizzo PA, Walsh TJ. Prevention of corticosteroid-induced  
991 suppression of human polymorphonuclear leukocyte-induced damage of *Aspergillus fumigatus*  
992 hyphae by granulocyte colony-stimulating factor and gamma interferon. *Infection and*  
993 *Immunity*. 1993;61(11):4870-7.
- 994 65. Ellett F, Jorgensen J, Frydman GH, Jones CN, Irimia D. Neutrophil Interactions Stimulate  
995 Evasive Hyphal Branching by *Aspergillus fumigatus*. *PLoS pathogens*. 2017;13(1):e1006154.

- 996 66. Aimanianda V, Bayry J, Romani L, Latge J, Bozza S, Kniemeyer O, et al. Surface hydrophobin  
997 prevents immune recognition of airborne fungal spores. *Nature*. 2009;460(7259):1117-21.
- 998 67. Inoue K, Koike E, Yanagisawa R, Adachi Y, Ishibashi K, Ohno N, et al. Pulmonary Exposure  
999 to Soluble Cell Wall  $\beta(1, 3)$ -Glucan of *Aspergillus* Induces Proinflammatory Response in  
1000 MICE. *International journal of immunopathology and pharmacology*. 2009;22(2):287-97.
- 1001 68. Hohl TM, Van Epps HL, Rivera A, Morgan LA, Chen PL, Feldmesser M, et al. *Aspergillus*  
1002 *fumigatus* Triggers Inflammatory Responses by Stage-Specific  $\beta$ -Glucan Display. *PLoS*  
1003 *Pathogens*. 2005;1(3):e30.
- 1004 69. Caffrey-Carr AK, Kowalski CH, Beattie SR, Blaseg NA, Upshaw CR, Thammahong A, et al.  
1005 Interleukin 1 $\alpha$  Is Critical for Resistance against Highly Virulent *Aspergillus fumigatus* Isolates.  
1006 *Infection and immunity*. 2017;85(12).
- 1007 70. d'Enfert C. Selection of multiple disruption events in *Aspergillus fumigatus* using the  
1008 orotidine-5'-decarboxylase gene, *pyrG*, as a unique transformation marker. *Current genetics*.  
1009 1996;30(1):76-82.
- 1010 71. Caffrey-Carr AK, Kowalski CH, Beattie SR, Blaseg NA, Upshaw CR, Thammahong A, et al.  
1011 Interleukin 1 $\alpha$  Is Critical for Resistance against Highly Virulent *Aspergillus fumigatus* Isolates.  
1012 *Infection and immunity*. 2017;85(12).
- 1013 72. Knox BP, Blachowicz A, Palmer JM, Romsdahl J, Huttenlocher A, Wang CCC, et al.  
1014 Characterization of *Aspergillus fumigatus* Isolates from air and surfaces of the international  
1015 space station. *mSphere*. 2016;1(5):e00227-16.
- 1016 73. Lupiañez CB, Villaescusa MT, Carvalho A, Springer J, Lackner M, Sánchez-Maldonado JM,  
1017 et al. Common Genetic Polymorphisms within NF $\kappa$ B-Related Genes and the Risk of  
1018 Developing Invasive Aspergillosis. *Frontiers in Microbiology*. 2016;7:1243.
- 1019 74. Miskolci V, Squirrell J, Rindy J, Vincent W, Sauer JD, Gibson A, et al. Distinct inflammatory  
1020 and wound healing responses to complex caudal fin injuries of larval zebrafish. *eLife*. 2019;8.
- 1021 75. Vincent WJB, Freisinger CM, Lam P, Huttenlocher A, Sauer J. Macrophages mediate flagellin  
1022 induced inflammasome activation and host defense in zebrafish. *Cellular Microbiology*.  
1023 2015;18(4):591.
- 1024 76. Lim FY, Ames B, Walsh CT, Keller NP. Co-ordination between BrlA regulation and secretion  
1025 of the oxidoreductase FmqD directs selective accumulation of fumiquinazoline C to conidial  
1026 tissues in *Aspergillus fumigatus*. *Cellular microbiology*. 2014;16(8):1267-83.
- 1027 77. Vincent WJB, Freisinger CM, Lam P, Huttenlocher A, Sauer J. Macrophages mediate flagellin  
1028 induced inflammasome activation and host defense in zebrafish. *Cellular Microbiology*.  
1029 2015;18(4):591.
- 1030 78. Jhingran A, Mar KB, Kumasaka DK, Knoblaugh SE, Ngo LY, Segal BH, et al. Tracing  
1031 Conidial Fate and Measuring Host Cell Antifungal Activity Using a Reporter of Microbial  
1032 Viability in the Lung. *Cell Reports*. 2012;2(6):1762-73.
- 1033 79. Su F, Juarez MA, Cooke CL, LaPointe L, Shavit JA, Yamaoka JS, et al. Differential  
1034 Regulation of Primitive Myelopoiesis in the Zebrafish by Spi-1/Pu.1 and C/ebp1. *Zebrafish*.  
1035 2007;4(3):187-99.

- 1036 80. Rosowski EE, Deng Q, Keller NP, Huttenlocher A. Rac2 Functions in Both Neutrophils and  
1037 Macrophages To Mediate Motility and Host Defense in Larval Zebrafish. *J I.*  
1038 2016;197(12):4780.
- 1039 81. Labun K, Montague TG, Krause M, Torres Cleuren YN, Tjeldnes H, Valen E. CHOPCHOP  
1040 V3: Expanding the CRISPR Web Toolbox beyond Genome Editing. *Nucleic Acids Research.*  
1041 2019;47(W1):W171-4.
- 1042 82. Labun K, Montague TG, Gagnon JA, Thyme SB, Valen E. CHOPCHOP V2: a Web Tool for  
1043 the Next Generation of CRISPR Genome Engineering. *Nucleic acids research.*  
1044 2016;44(W1):W272-6.
- 1045 83. Montague TG, Cruz JM, Gagnon JA, Church GM, Valen E. CHOPCHOP: a CRISPR/Cas9 and  
1046 TALEN web tool for genome editing. *Nucleic acids research.* 2014;42:W401-7.
- 1047 84. Oliveira E, Casado M, Raldúa D, Soares A, Barata C, Piña B. Retinoic acid receptors'  
1048 expression and function during zebrafish early development. *The Journal of steroid*  
1049 *biochemistry and molecular biology.* 2013;138:143-51.
- 1050 85. Huemer K, Squirrel JM, Swader R, Pelkey K, LeBert DC, Huttenlocher A, et al. Long-term  
1051 Live Imaging Device for Improved Experimental Manipulation of Zebrafish Larvae. *Journal of*  
1052 *Visualized Experiments.* 2017;(128):56340.
- 1053 86. Huemer K, Squirrel JM, Swader R, LeBert DC, Huttenlocher A, Eliceiri KW. zWEDGI:  
1054 Wounding and Entrapment Device for Imaging Live Zebrafish Larvae. *Zebrafish.*  
1055 2017;14(1):42-50.
- 1056 87. Schindelin J, Arganda-Carreras I, Frise E, Kaynig V, Longair M, Pietzsch T, et al. Fiji: an  
1057 open-source platform for biological-image analysis. *Nature Methods.* 2012;9(7):676-82.
- 1058 88. Galindo-Villegas J, García-Moreno D, de Oliveira S, Meseguer J, Mulero V. Regulation of  
1059 immunity and disease resistance by commensal microbes and chromatin modifications during  
1060 zebrafish development. *Proceedings of the National Academy of Sciences.*  
1061 2012;109(39):E2605-14.

1062

## 1063 **Figure legends**

1064 **Figure 1. Dexamethasone suppresses NF- $\kappa$ B activation and increases susceptibility to**  
1065 ***Aspergillus fumigatus* via the glucocorticoid receptor. (A)** Survival of wild-type larvae  
1066 injected at 2 dpf with CEA10 *A. fumigatus* spores or PBS mock-infection in the presence of 10  
1067  $\mu$ M dexamethasone or DMSO vehicle control. At least 24 larvae per condition, per replicate  
1068 were used and the total larval N per condition is indicated. Cox proportional hazard regression

1069 analysis was used to calculate P values and hazard ratio (HR). Average injection CFUs:  
1070 dexamethasone = 15, DMSO = 12. **(B, C)** Larvae of NF- $\kappa$ B reporter line (*Tg(NF- $\kappa$ B RE:GFP)*)  
1071 were injected with CEA10 *A. fumigatus* spores and were exposed to 10  $\mu$ M dexamethasone or  
1072 DMSO. Larvae were imaged at 1 dpi. **(B)** Representative images showing relative GFP  
1073 expression from z projection of 6 slices. Scale bar = 50  $\mu$ m. **(C)** Quantification of fluorescent  
1074 expression in the hindbrain ventricle at 1 dpi is shown with emmeans  $\pm$  SEM from three  
1075 independent replicates and the total larval N per condition is indicated. Each data point  
1076 represents an individual larva, color-coded by replicate. P values were calculated by ANOVA.  
1077 **(D)** Larvae were injected with GFP-expressing TFYL49.1 (CEA10) spores and exposed to 10  
1078  $\mu$ M dexamethasone or DMSO. At 1 and 2 dpi, larvae were screened for germination and total  
1079 RNA was extracted from each pooled group. RT-qPCR analysis of cytokine expression in pooled  
1080 larvae is shown. Data are normalized to DMSO no germination control group. P values were  
1081 calculated by Student's t-test. Data are from three independent replicates. **(E)** NF- $\kappa$ B inhibitor  
1082 *ikbkb* expression in larvae injected with CEA10 spores or PBS mock-infection and exposed to 10  
1083  $\mu$ M dexamethasone or DMSO is shown. Total RNA was extracted at 1 and 2 dpi from 20 pooled  
1084 larvae per condition per day. Data are normalized to DMSO PBS mock-infection at each day  
1085 post injection. P values were calculated by Student's t-test. Data are from three independent  
1086 replicates. **(F)** Embryos at 1 cell stage were injected with gRNAs targeting glucocorticoid  
1087 receptor gene *nr3c1* or *luciferase* control together with Cas9 protein. At 2 dpf, larvae were  
1088 treated with 10  $\mu$ M dexamethasone or DMSO. Total RNA from 20 pooled larvae per condition  
1089 was extracted at 1 day post treatment (dpt) and *ikbkb* expression was quantified using RT-qPCR.  
1090 Data are normalized to *luciferase* gRNA + DMSO group. P values were calculated by Student's  
1091 t-test. Data are from three independent replicates. **(G)** Survival of *nr3c1* mutant larvae injected

1092 with CEA10 spores and exposed to 10  $\mu$ M dexamethasone or DMSO. Data are pooled from three  
1093 independent replicates, at least 23 larvae per condition, per replicate and the total larval N per  
1094 condition is indicated. Cox proportional hazard regression analysis was used to calculate P  
1095 values and hazard ratios (HR). Average injection CFUs: *nr3c1* = 25 or *luciferase* = 26.

1096

1097 **Figure 2. Dexamethasone moderately suppresses macrophage recruitment but not**

1098 **neutrophil recruitment.** Larvae with labeled macrophages (*Tg(mpeg1:H2B-mCherry)*) and  
1099 neutrophils (*Tg(lyz:BFP)*) were injected with GFP-expressing TFYL49.1 (CEA10) spores at 2  
1100 dpf, exposed to 10  $\mu$ M dexamethasone or DMSO vehicle control and live imaged at 1, 2, 3, and 5  
1101 dpi. Data are pooled from three independent replicates, at least 10 larvae per condition, per  
1102 replicate. **(A)** Representative images show different patterns of phagocyte recruitment across  
1103 multiple days in larvae exposed to dexamethasone or DMSO. Scale bar = 50  $\mu$ m. **(B)** Number of  
1104 macrophages recruited, **(C)** macrophage cluster area, and **(D)** number of neutrophils recruited  
1105 were quantified from the images. (B-D) Bars represent emmeans  $\pm$  SEM and P values were  
1106 calculated by ANOVA. Each line represents an individual larva. **(E, F)** Number of recruited  
1107 macrophages (E) and neutrophils (F) one day before germination occurred, on the day of  
1108 germination, and on the day invasive hyphae occurred were plotted for larvae that experienced  
1109 fungal growth. Bars represent emmeans  $\pm$  SEM and P values were calculated by ANOVA. Each  
1110 data point represents an individual larva, color-coded by replicate.

1111

1112 **Figure 3. Dexamethasone does not affect spore killing.** **(A, B)** Macrophage-labeled larvae  
1113 (*Tg(mfap4:BFP)*) were injected with GFP-expressing *A. fumigatus* TFYL49.1 (CEA10) spores  
1114 coated with AlexaFluor546 at 2 dpf, exposed to 10  $\mu$ M dexamethasone or DMSO vehicle



1115 control, and live imaged at 2 dpi. (A) Representative images of z projection of 3 slices showing  
1116 live (filled arrow) and dead (open arrow) spores within a macrophage. Scale bar = 10  $\mu$ m. (B)  
1117 The percentage of live spores in the hindbrain per larvae is shown with bars representing  
1118 emmeans  $\pm$  SEM from three independent replicates, and the total larval N per condition is  
1119 indicated. Each data point represents an individual larva, color-coded by replicate. P values were  
1120 calculated by ANOVA. (C) Wild-type larvae were injected with CEA10 spores at 2 dpf, exposed  
1121 to 10  $\mu$ M dexamethasone or DMSO vehicle control, and fungal burden was quantified by  
1122 homogenizing and plating individual larvae for CFUs at multiple days post injection. Eight  
1123 larvae per condition, per dpi, per replicate were quantified, and the number of CFUs at each dpi  
1124 is represented as a percentage of the initial spore burden. Bars represent emmeans  $\pm$  SEM from  
1125 three independent replicates, P values calculated by ANOVA. Average injection CFU: 32.

1126

1127 **Figure 4. Dexamethasone suppresses immune control of *A. fumigatus* invasive hyphal**  
1128 **growth.** Wild-type larvae were injected with GFP-expressing TFYL49.1 (CEA10) spores at 2  
1129 dpf, exposed to 10  $\mu$ M dexamethasone or DMSO vehicle control and imaged at 1, 2, 3, and 5 dpi.  
1130 Data are pooled from three independent replicates, at least 10 larvae per condition, per replicate.  
1131 (A) Representative images show hyphal growth differences in larvae exposed to dexamethasone  
1132 or DMSO. Insets show a germinated spore and branched invasive hyphae (open arrow). Scale bar  
1133 = 50  $\mu$ m (5 and 10  $\mu$ m in insets). (B) Cumulative percentage of larvae with germination (dotted  
1134 line) and invasive hyphae (solid line) through 5 dpi. Cox proportional hazard regression analysis  
1135 was used to calculate P values and hazard ratios (HR). (C) In larvae with fungal germination,  
1136 fungal area was quantified from maximum intensity projection images. Each line represents an  
1137 individual larva and bars represent emmeans  $\pm$  SEM. (D) Severity of fungal growth was scored

1138 for all larvae and displayed as a heatmap. Representative images for each score can be found in  
1139 S4 Fig.

1140

1141 **Figure 5. Dexamethasone primarily suppresses neutrophil-mediated host protection.**

1142 Survival of larvae injected at 2 dpf with CEA10 *A. fumigatus* spores and exposed to 10  $\mu$ M  
1143 dexamethasone or DMSO vehicle control. Data are pooled from three independent replicates, at  
1144 least 12 larvae per condition, per replicate and the total larval N per condition is indicated in each  
1145 figure. Cox proportional hazard regression analysis was used to calculate P values and hazard  
1146 ratios (HR). **(A)** Survival of neutrophil-defective larvae (*mpx:rac2D57N*) and wild-type larvae.  
1147 Average injection CFUs: wild-type = 26, *mpx:rac2D57N* = 29. **(B)** Survival of macrophage-  
1148 deficient or control larvae. Development of macrophages was inhibited by 0.05 mM *pu.1*  
1149 morpholino (MO). Control larvae received standard control MO. Average injection CFUs:  
1150 control MO = 31, *pu.1* MO = 25. **(C)** Survival of macrophage-deficient *irf8*<sup>-/-</sup> or control (*irf8*<sup>+/+</sup>  
1151 or *irf8*<sup>+/-</sup>) larvae. Average injection CFUs: *irf8*<sup>+/+</sup> or *irf8*<sup>+/-</sup> = 71, *irf8*<sup>-/-</sup> = 50.

1152

1153 **Figure 6. Dexamethasone suppresses neutrophil-mediated control of *A. fumigatus* invasive**

1154 **hyphal growth.** Macrophage-deficient *irf8*<sup>-/-</sup> larvae with labeled neutrophils (*Tg(lyz:BFP)*) were  
1155 injected with GFP-expressing TFYL49.1 (CEA10) spores at 2 dpf, exposed to 10  $\mu$ M  
1156 dexamethasone or DMSO vehicle control and live imaged at 1, 2, 3, and 5 dpi. Data are pooled  
1157 from three independent replicates, at least 10 larvae per condition, per replicate. **(A)**  
1158 Representative images show hyphal growth differences and neutrophil recruitment in larvae  
1159 exposed to dexamethasone or DMSO. Inset shows a germinated spore. Scale bar = 50  $\mu$ m (inset  
1160 5  $\mu$ m). **(B)** Cumulative percentage of larvae with germination (dotted line) and invasive hyphae



1161 (solid line) through 5 dpi. Cox proportional hazard regression analysis was used to calculate P  
1162 values and hazard ratios (HR). (C) Severity of fungal growth was scored for all larvae and  
1163 displayed as a heatmap. Representative images for each score can be found in S4 Fig. (D-F) In  
1164 larvae in which fungal growth occurred, the day on which germination (D) and invasive hyphae  
1165 (E) was first observed and the number of days between germination and invasive hyphae (F) are  
1166 plotted. Bars represent emmeans  $\pm$  SEM and P values were calculated by ANOVA. Each data  
1167 point represents an individual larva, color-coded by replicate.

1168

1169 **Figure 7. Neutrophils fail to control invasive hyphal growth in IKK $\gamma$  crispant larvae.**

1170 Macrophage-sufficient (*irf8*<sup>+/+</sup> or *irf8*<sup>+/-</sup>) and macrophage-deficient (*irf8*<sup>-/-</sup>) embryos at 1 cell  
1171 stage were injected with Cas9 protein and 2 gRNAs targeting the IKK $\gamma$  gene *ikbkg* or control  
1172 gRNAs targeting *luciferase*. (A) Survival of larvae after injection with CEA10 spores at 2 dpf.  
1173 Data are pooled from three independent replicates and the total larval N per condition is  
1174 indicated. Cox proportional hazard regression analysis was used to calculate P values and hazard  
1175 ratios (HR). Average injection CFUs: control + *luciferase* gRNA = 32, control + *ikbkg* gRNA =  
1176 30, *irf8*<sup>-/-</sup> + *luciferase* gRNA = 31, *irf8*<sup>-/-</sup> + *ikbkg* gRNA = 29. (B-H) *irf8*<sup>-/-</sup> embryos with labeled  
1177 neutrophils (*Tg(lyz:BFP)*), injected with *ikbkg* or control gRNAs, were injected at 2 dpf with  
1178 GFP-expressing TFYL49.1 spores and live imaged at 1, 2, 3, and 5 dpi. Data are pooled from  
1179 three independent replicates, at least 10 larvae per condition, per replicate. (B) Representative  
1180 images show hyphal growth differences in larvae injected with *ikbkg* or control gRNAs. Scale  
1181 bar = 50  $\mu$ m. (C) Cumulative percentage of larvae with germination (dotted line) and invasive  
1182 hyphae (solid line) through 5 dpi. Cox proportional hazard regression analysis was used to  
1183 calculate P values and hazard ratios (HR). (D) Fungal area was quantified from maximum

1184 intensity projection images. Bars represent emmeans  $\pm$  SEM and P values were calculated by  
1185 ANOVA. Each line represents an individual larva. (E) Severity of fungal growth was scored for  
1186 all larvae and displayed as a heatmap. Representative images for each score can be found in S4  
1187 Fig. (F-H) In larvae in which fungal growth occurred, the day on which germination (F) and  
1188 invasive hyphae (G) was first observed and the number of days between germination and  
1189 invasive hyphae (H) are plotted. Bars represent emmeans  $\pm$  SEM and P values calculated by  
1190 ANOVA. Each data point represents an individual larva, color-coded by replicate. (I) *irf8*<sup>-/-</sup>  
1191 larvae injected with *ikbkg* or control gRNAs were injected at 2 dpf with GFP-expressing  
1192 TFYL49.1 spores, treated with 10  $\mu$ M dexamethasone or DMSO, and live imaged at 1 and 2 dpi.  
1193 The cumulative percentage of larvae with germination (dotted line) and invasive hyphae (solid  
1194 line) through 2 dpi is shown. Data are pooled from three independent replicates, 12 larvae per  
1195 condition, per replicate. Cox proportional hazard regression analysis was used to calculate P  
1196 values and hazard ratios (HR).

## 1197 **Supporting Information**

1198 **S1 Fig. Dexamethasone suppresses NF- $\kappa$ B activation.** (A) Larvae of NF- $\kappa$ B reporter line  
1199 (*Tg(NF- $\kappa$ B RE:GFP)*) were injected with CEA10 spores and were exposed to 10  $\mu$ M  
1200 dexamethasone or DMSO vehicle control. Fluorescent expression was quantified in the hindbrain  
1201 ventricle from z projections at 2 dpi. Quantification data are shown with emmeans  $\pm$  SEM from  
1202 three independent replicates and the total larval N per condition is indicated. Each data point  
1203 represents an individual larvae, color-coded by replicate. P values were calculated by ANOVA.  
1204 (B) Larvae were injected with GFP-expressing TFYL49.1 (CEA10) spores and exposed to 10  
1205  $\mu$ M dexamethasone or DMSO. At 1 and 2 dpi, larvae were screened for germination and total

1206 RNA was extracted from each pooled group. RT-qPCR analysis of cytokine expression in larvae  
1207 is shown. Data are normalized to DMSO no germination control group. P values were calculated  
1208 by Student's t-test. Data are from three independent replicates.

1209

1210 **S2 Fig. Generation of glucocorticoid receptor crisprant larvae. (A-B)** Design and efficiency of

1211 *nr3c1* gRNAs. (A) Zebrafish glucocorticoid receptor (*nr3c1*) gene structure and the target sites

1212 for the two gRNAs and primers used for PCR. (B) 1 cell stage embryos were injected with

1213 gRNAs targeting *nr3c1* or control gRNAs targeting *luciferase* together with Cas9 protein. At 2

1214 dpf, genomic DNA was extracted from individual larvae. Successful targeting of DNA was

1215 confirmed by PCR using primer pairs illustrated in (A). Gel electrophoresis indicates clean bands

1216 for control larvae with F1R1 and F2R2 primers, while for the gRNA-injected larvae, the bands

1217 are blurry indicating random mosaic insertions and deletions. F1R2 primer pair indicates that

1218 ~36 kb piece of DNA can be excised in larvae injected with both target gRNAs. No PCR band is

1219 detected in control larvae due to the large amplicon size. (C) Survival of *nr3c1* mutant or control

1220 larvae injected with PBS and exposed to 10  $\mu$ M dexamethasone or DMSO. Data are pooled from

1221 three independent replicates, at least 22 larvae per condition, per replicate and the total larval N

1222 per condition is indicated in each figure. Cox proportional hazard regression analysis was used to

1223 calculate P values and hazard ratios (HR).

1224

1225 **S3. Fig. Dexamethasone does not affect *A. fumigatus* spore germination *in vitro*.** GFP-

1226 expressing TFYL49.1 (CEA10) spores were inoculated into the middle of solid GMM plates

1227 containing 10  $\mu$ M dexamethasone or DMSO vehicle control. (A) The diameter of the colony was

1228 measured after 1-4 days. (B-C) At 2 days post culture, a sample from the edge of the colony of

1229 each plate was transferred to a glass slide and imaged with a confocal microscope. Four fields  
1230 were imaged for each slide. Data are pooled from two independent replicates, and three plates  
1231 per condition, per replicate were used. (B) A representative image showing branched hyphae;  
1232 yellow arrows point to nodes. Scale bar = 100  $\mu\text{m}$ . (C) Per field of view, the number of nodes  
1233 were counted and normalized to the total fungal area. Fungal area was quantified from maximum  
1234 intensity projection images. Bars represent means  $\pm$  SEM and P values calculated by Student's  
1235 T-test. Each data point represents the average value from individual plates, color-coded by  
1236 replicate.

1237

1238 **S4 Fig. Representative images of categories of *A. fumigatus* hyphal growth.** Wild-type larvae  
1239 were injected with GFP-expressing TFYL49.1 (CEA10) spores at 2 dpf, exposed to 10  $\mu\text{M}$   
1240 dexamethasone or DMSO vehicle control and live imaged at 1, 2, 3, and 5 dpi. Incidences of  
1241 hyphal growth were scored depending on the extent of hyphal growth. Category 1: presence of a  
1242 germ tube. Category 2: presence of branched hyphae (filled arrow), yet small fungal bolus.  
1243 Category 3: presence of spread-out invasive hyphae. Category 4: presence of severe invasive  
1244 hyphae and tissue damage. Scale bar: 50  $\mu\text{m}$  or 25  $\mu\text{m}$ .

1245

1246 **S5 Fig. Survival of phagocyte-deficient larvae and validation of macrophage depletion with**  
1247 **low concentration *pu.1* morpholino. (A-D)** Survival of larvae injected at 2 dpf with CEA10 *A.*  
1248 *fumigatus* spores or PBS mock-infection in the presence of 10  $\mu\text{M}$  dexamethasone or DMSO  
1249 vehicle control. (A) Survival of phagocyte-depleted or control larvae injected with CEA10  
1250 spores. Development of all phagocytes was inhibited by 0.5 mM of *pu.1* morpholino (MO).  
1251 Control larvae received standard control MO. Data are pooled from two independent replicates,

1252 at least 23 larvae per condition, per replicate and the total larval N per condition is indicated in  
1253 the figure. Average injection CFUs: control MO = 55, *pu.1* MO = 65. (B) Survival of neutrophil-  
1254 defective larvae (*mpx:rac2D57N*) and wild-type larvae after PBS-mock infection. (C, D)  
1255 Macrophages were depleted via clodronate liposome i.v. injection at 1 dpf. Control larvae  
1256 received PBS liposomes. Survival of macrophage-depleted larvae injected with (C) CEA10  
1257 spored or (D) PBS mock-infection. Average injection CFUs: PBS liposomes = 23, clodronate  
1258 liposomes = 20. **(E-H)** Development of macrophages was inhibited by 0.05 mM *pu.1* MO.  
1259 Control larvae received standard control MO. (E) Low dose *pu.1* MO or control larvae  
1260 expressing fluorescent markers in macrophages (*Tg(mpeg1:H2B-GFP)*) or neutrophils  
1261 (*Tg(mpx:mCherry)*) were imaged around the caudal hematopoietic area to visualize phagocytes  
1262 at 2 dpf. Representative images show a lack of macrophages but intact neutrophils. Scale bar =  
1263 100  $\mu$ m. (F, G) Low dose *pu.1* MO or control larvae with fluorescent neutrophils  
1264 (*Tg(mpx:mCherry)*) were wounded by tail transection and were imaged at 2 hours post injury  
1265 (hpi). (F) Representative images showing neutrophil recruitment to the wounding site. Scale bar  
1266 = 50  $\mu$ m. (G) Quantification of the number of neutrophils at the wound site is shown with means  
1267  $\pm$  SEM from one replicate and the total larval N per condition is indicated. Each data point  
1268 represents an individual larva. (H) Survival of low dose *pu.1* MO macrophage-deficient or  
1269 control larvae after PBS mock-infection is shown. (B-D, H) Data are pooled from three  
1270 independent replicates, at least 9 larvae per condition, per replicate and the total larval N per  
1271 condition is indicated in each figure. Cox proportional hazard regression analysis was used to  
1272 calculate P values and hazard ratios (HR).  
1273

1274 **S6 Fig. Dexamethasone does not significantly affect neutrophil recruitment to the infection**  
1275 **site in *irf8*<sup>-/-</sup> larvae.** *irf8*<sup>-/-</sup> larvae with labeled neutrophils (*Tg(lyz:BFP)*) were injected with GFP-  
1276 expressing TFYL49.1 (CEA10) spores at 2 dpf, exposed to 10 μM dexamethasone or DMSO  
1277 vehicle control and live imaged at 1, 2, 3, and 5 dpi. Data are pooled from three independent  
1278 replicates, at least 10 larvae per condition, per replicate. **(A)** Fungal area was quantified from  
1279 maximum intensity projection images. **(B)** Neutrophil cluster area was quantified from maximum  
1280 intensity projection images. (A, B) Bars represent emmeans ± SEM and P values were calculated  
1281 by ANOVA. Each line represents an individual larva. **(C)** Neutrophil cluster area one day before  
1282 germination occurred, on the day of germination, and on the day invasive hyphae occurred were  
1283 quantified for larvae that experienced fungal growth. Bars represent emmeans ± SEM and P  
1284 values were calculated by ANOVA. Each data point represents an individual larva, color-coded  
1285 by replicate. **(D)** The correlation of neutrophil cluster area to fungal area was plotted for larvae  
1286 that had germination and invasive hyphae. All larvae have had neutrophil clusters at some point  
1287 during infection.

1288

1289 **S7 Fig. Generation and validation of IKKγ-deficient *ikbkg* crispant larvae.** **(A)** Zebrafish  
1290 IKKγ (*ikbkg*) gene structure and the target sites for gRNAs and primers used for PCR. **(B)** 1 cell  
1291 stage embryos were injected with gRNAs targeting *nr3c1* or control gRNAs targeting *luciferase*  
1292 together with Cas9 protein. At 2 dpf, genomic DNA was extracted from individual larvae.  
1293 Successful targeting of DNA was demonstrated by PCR using primer pairs in (A). Gel  
1294 electrophoresis indicates clean bands for control larvae with F1R1 and F2R2 primers, while for  
1295 the target gRNA-injected larvae, the bands are blurry indicating random mosaic insertions and  
1296 deletions. F1R2 primer pair indicates that ~1.6 kb piece of DNA can be excised in larvae injected

1297 with both target gRNAs. No PCR band is detected in control larvae due to the large amplicon  
1298 size.

1299

1300 **S8 Fig. IKK $\gamma$  targeting does not significantly inhibit neutrophil recruitment to *A. fumigatus***

1301 **infection.** *irf8*<sup>-/-</sup> embryos with labeled neutrophils (*Tg(lyz:BFP)*) were injected with *ikbkg* or

1302 control gRNAs. At 2 dpf, larvae were injected with GFP-expressing TFYL49.1 spores and live

1303 imaged at 1, 2, 3, and 5 dpi. Data are pooled from three independent replicates, at least 10 larvae

1304 per condition, per replicate. **(A)** Neutrophil cluster area was quantified from maximum intensity

1305 projection images. Bars represent emmeans  $\pm$  SEM and P values were calculated by ANOVA.

1306 Each line represents an individual larva. **(B)** Neutrophil cluster area one day before germination

1307 occurred, on the day of germination, and on the day invasive hyphae occurred were plotted for

1308 larvae that experienced fungal growth. Bars represent emmeans  $\pm$  SEM and P values were

1309 calculated by ANOVA. Each data point represents an individual larva, color-coded by replicate.

1310 **(C)** The correlation between neutrophil cluster area and fungal area was plotted for larvae that

1311 had germination and invasive hyphae. All larvae had neutrophil clusters at some point during

1312 infection.

1313

1314 **S1 Table. Primers used for RT-qPCR and references.**

| Name            | Sequence (5'-3')     | Reference  |
|-----------------|----------------------|------------|
| <i>qrps11_F</i> | TAAGAAATGCCCCTTCACTG | [84]       |
| <i>qrps11_R</i> | GTCTCTTCTCAAACGGTTG  |            |
| <i>qtnfa_F</i>  | AGGCAATTTCACTTCCAAGG | This study |

|                  |                       |            |
|------------------|-----------------------|------------|
| <i>qtnfa_R</i>   | CAAGCCACCTGAAGAAAAGG  |            |
| <i>qillb_F</i>   | GCCTGTGTGTTTGGGAATCT  | [84, 88]   |
| <i>qillb_R</i>   | TGATAAACCAACCGGACA    |            |
| <i>qirg1_F</i>   | ACTGCTGGCTTTCAATGTGG  | This study |
| <i>qirg1_R</i>   | AGACGCAGGAGTTTAGCTGT  |            |
| <i>qarg1_F</i>   | GCCGATGTCTTACCTCATCC  | This study |
| <i>qarg1_R</i>   | CATCCTGAGCTGCTATGCAA  |            |
| <i>qil10_F</i>   | AGCACTCCACAACCCCAAT   | This study |
| <i>qil10_R</i>   | TTCAAAGGGATTTTGGCAAG  |            |
| <i>qtgfb1a_F</i> | AACTACTGCATGGGGTCCTG  | This study |
| <i>qtgfb1a_R</i> | ACCAGGGTTGTGGTGTGTTGT |            |



bioRxiv preprint doi: <https://doi.org/10.1101/2023.12.21.572739>; this version posted December 22, 2023. The copyright holder for this preprint (which was not certified by peer review) is the author/funder, who has granted bioRxiv a license to display the preprint in perpetuity. It is made available under aCC-BY 4.0 International license.

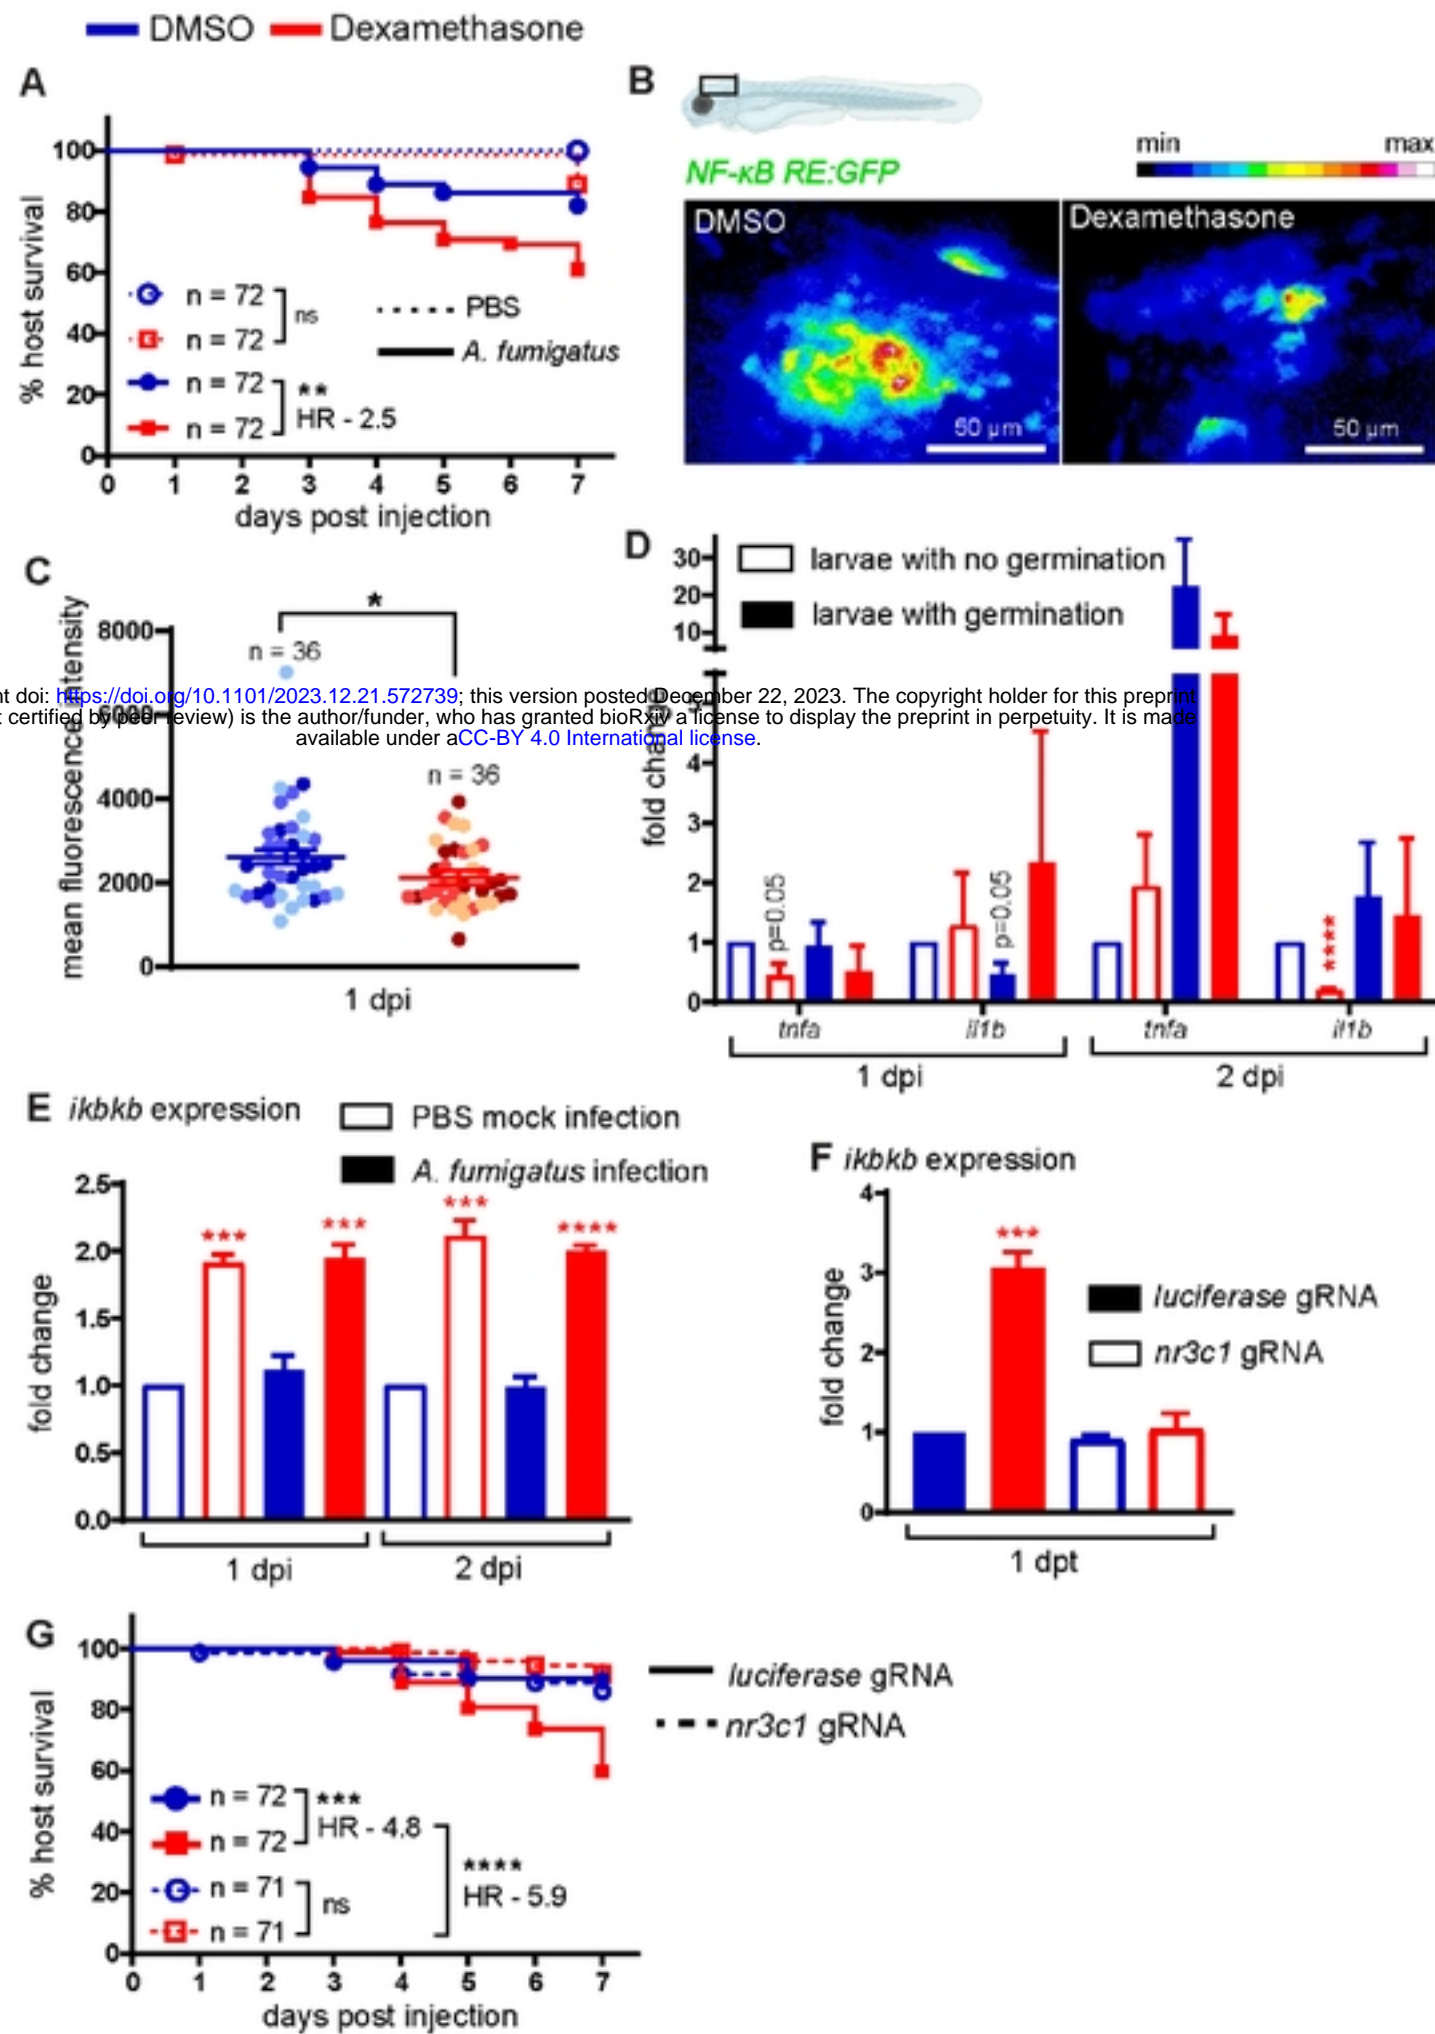

1

2 **Figure 1. Dexamethasone suppresses NF-κB activation and increases susceptibility to**  
 3 ***Aspergillus fumigatus* via the glucocorticoid receptor. (A)** Survival of wild-type larvae  
 4 injected at 2 dpf with CEA10 *A. fumigatus* spores or PBS mock-infection in the presence of 10  
 5 μM dexamethasone or DMSO vehicle control. At least 24 larvae per condition, per replicate

6 were used and the total larval N per condition is indicated. Cox proportional hazard regression  
7 analysis was used to calculate P values and hazard ratio (HR). Average injection CFUs:  
8 dexamethasone = 15, DMSO = 12. **(B, C)** Larvae of NF- $\kappa$ B reporter line (*Tg(NF- $\kappa$ B RE:GFP)*)  
9 were injected with CEA10 *A. fumigatus* spores and were exposed to 10  $\mu$ M dexamethasone or  
10 DMSO. Larvae were imaged at 1 dpi. **(B)** Representative images showing relative GFP  
11 expression from z projection of 6 slices. Scale bar = 50  $\mu$ m. **(C)** Quantification of fluorescent  
12 expression in the hindbrain ventricle at 1 dpi is shown with emmeans  $\pm$  SEM from three  
13 independent replicates and the total larval N per condition is indicated. Each data point  
14 represents an individual larva, color-coded by replicate. P values were calculated by ANOVA.  
15 **(D)** Larvae were injected with GFP-expressing TFYL49.1 (CEA10) spores and exposed to 10  
16  $\mu$ M dexamethasone or DMSO. At 1 and 2 dpi, larvae were screened for germination and total  
17 RNA was extracted from each pooled group. RT-qPCR analysis of cytokine expression in pooled  
18 larvae is shown. Data are normalized to DMSO no germination control group. P values were  
19 calculated by Student's t-test. Data are from three independent replicates. **(E)** NF- $\kappa$ B inhibitor  
20 *ikkb* expression in larvae injected with CEA10 spores or PBS mock-infection and exposed to 10  
21  $\mu$ M dexamethasone or DMSO is shown. Total RNA was extracted at 1 and 2 dpi from 20 pooled  
22 larvae per condition per day. Data are normalized to DMSO PBS mock-infection at each day  
23 post injection. P values were calculated by Student's t-test. Data are from three independent  
24 replicates. **(F)** Embryos at 1 cell stage were injected with gRNAs targeting glucocorticoid  
25 receptor gene *nr3c1* or *luciferase* control together with Cas9 protein. At 2 dpf, larvae were  
26 treated with 10  $\mu$ M dexamethasone or DMSO. Total RNA from 20 pooled larvae per condition  
27 was extracted at 1 day post treatment (dpt) and *ikkb* expression was quantified using RT-qPCR.  
28 Data are normalized to *luciferase* gRNA + DMSO group. P values were calculated by Student's

bioRxiv preprint doi: <https://doi.org/10.1101/2023.12.21.572739>; this version posted December 22, 2023. The copyright holder for this preprint (which was not certified by peer review) is the author/funder, who has granted bioRxiv a license to display the preprint in perpetuity. It is made available under aCC-BY 4.0 International license.

29 t-test. Data are from three independent replicates. **(G)** Survival of *nr3c1* mutant larvae injected  
30 with CEA10 spores and exposed to 10  $\mu$ M dexamethasone or DMSO. Data are pooled from three  
31 independent replicates, at least 23 larvae per condition, per replicate and the total larval N per  
32 condition is indicated. Cox proportional hazard regression analysis was used to calculate P  
33 values and hazard ratios (HR). Average injection CFUs: *nr3c1* = 25 or *luciferase* = 26.  
34



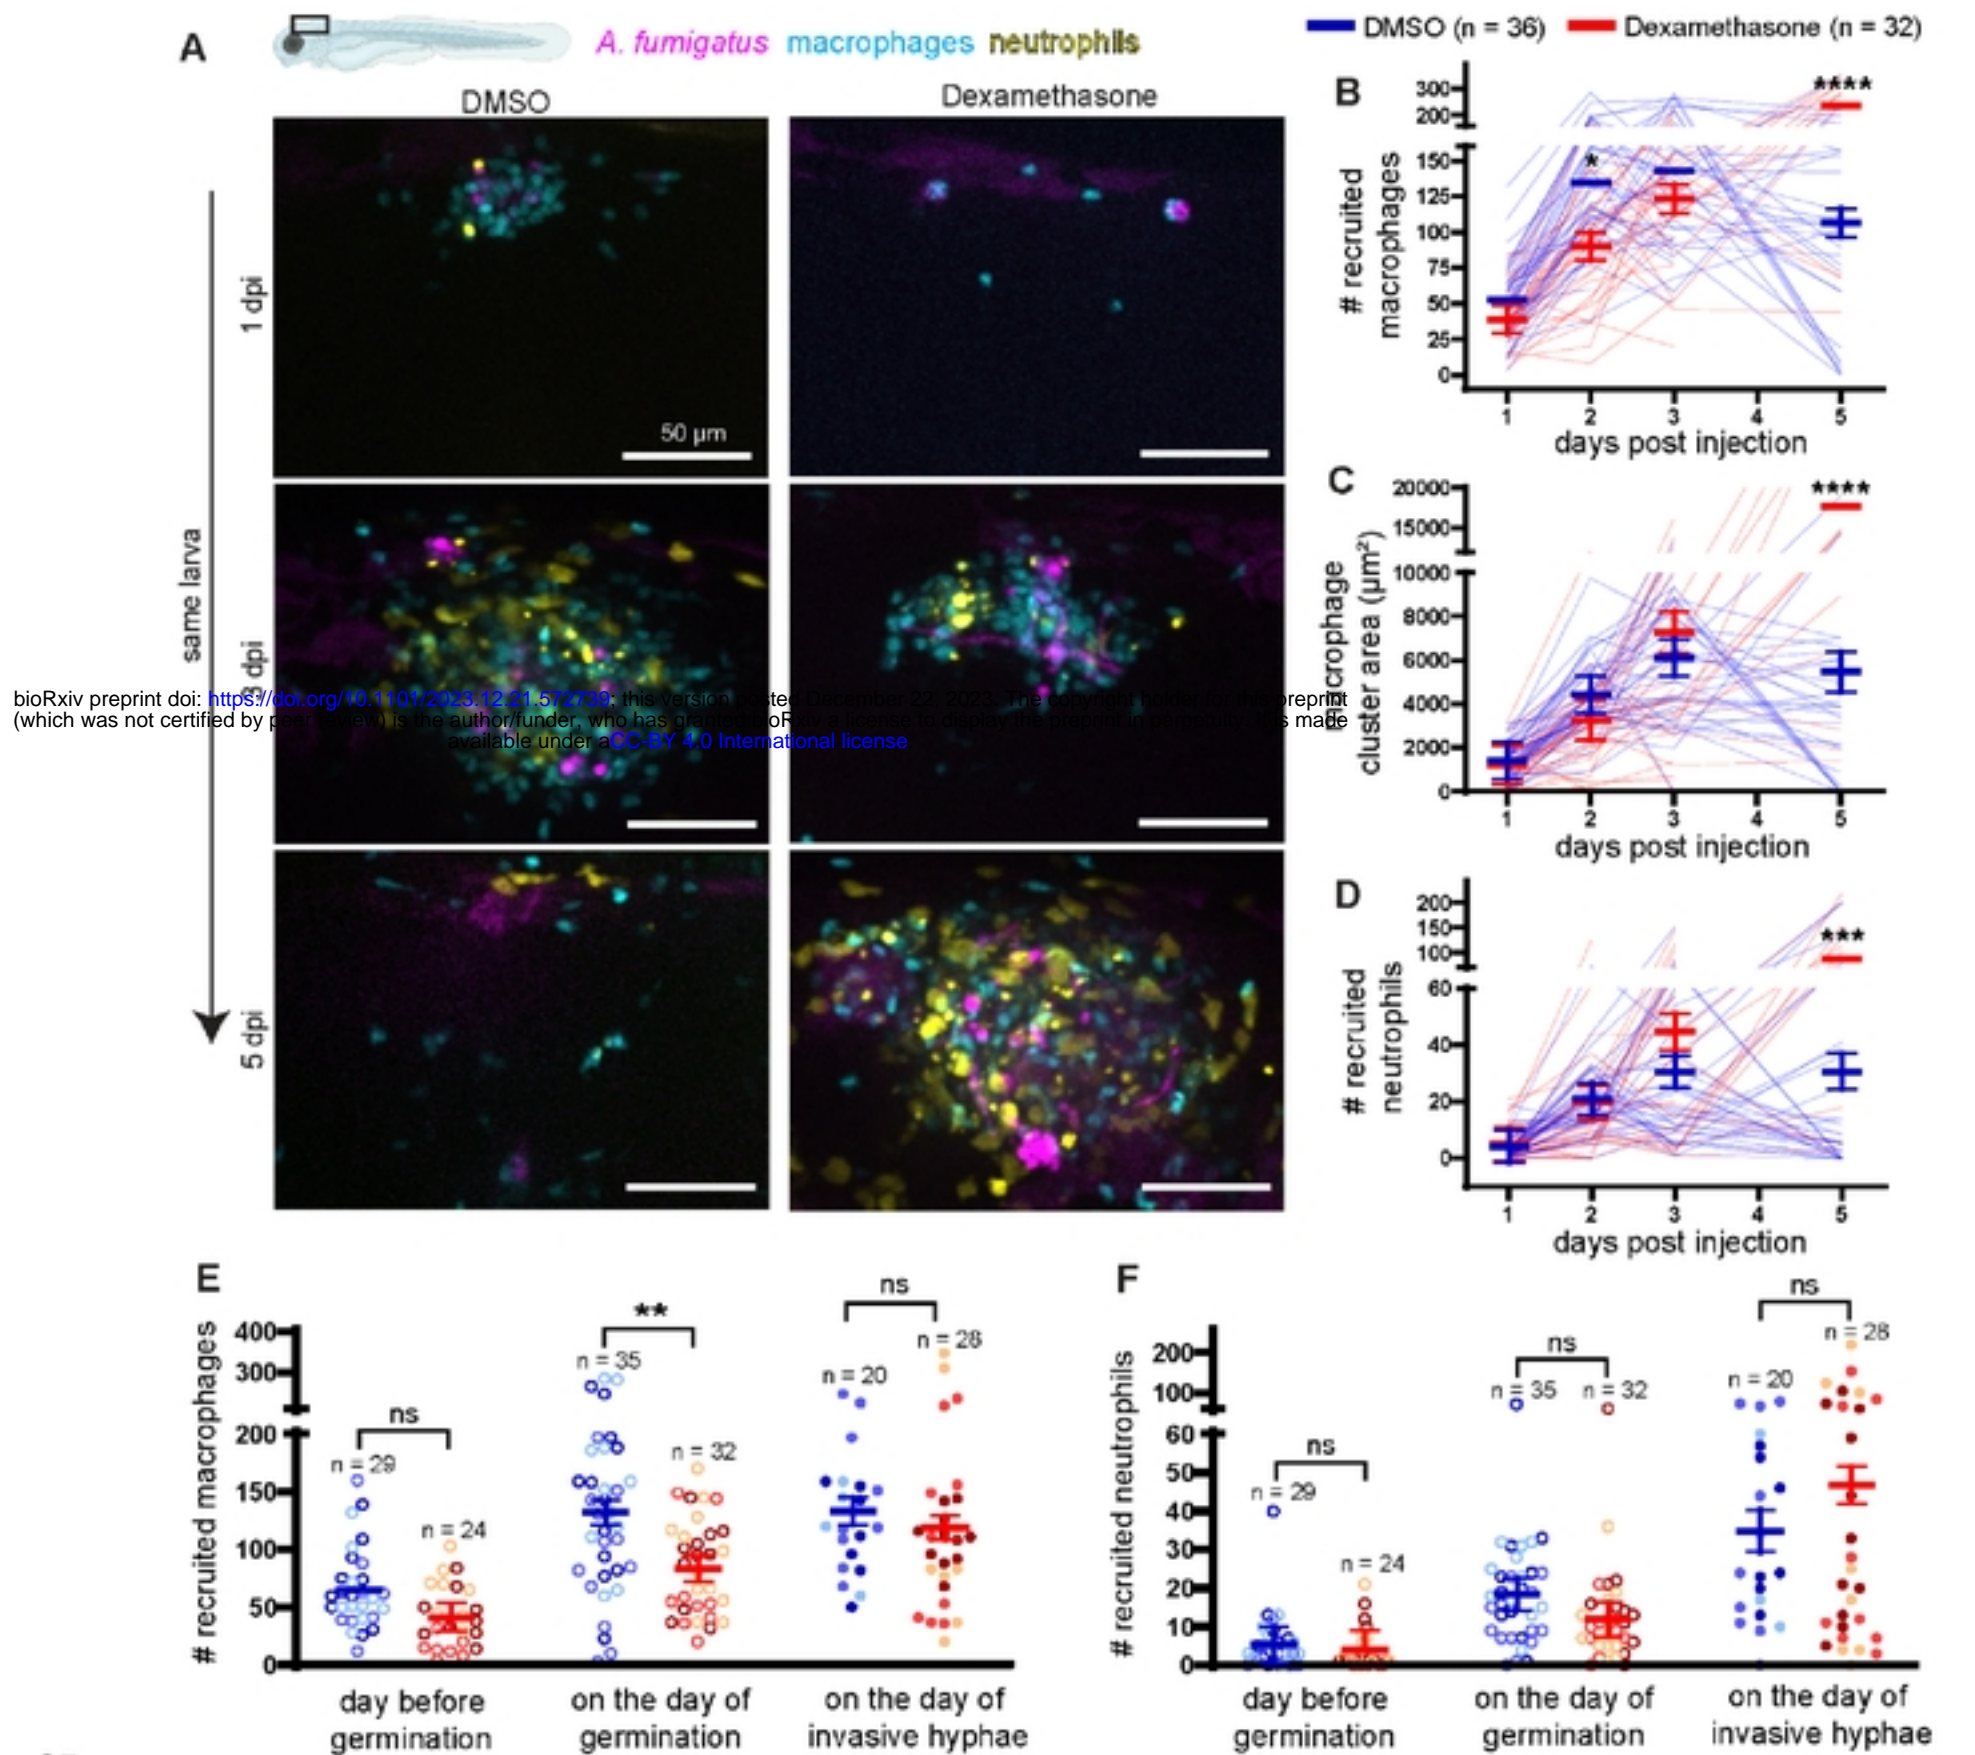

35

36 **Figure 2. Dexamethasone moderately suppresses macrophage recruitment but not**

37 **neutrophil recruitment.** Larvae with labeled macrophages (*Tg(mpeg1:H2B-mCherry)*) and

38 neutrophils (*Tg(lyz:BFP)*) were injected with GFP-expressing TFYL49.1 (CEA10) spores at 2

39 dpf, exposed to 10  $\mu$ M dexamethasone or DMSO vehicle control and live imaged at 1, 2, 3, and 5

40 dpi. Data are pooled from three independent replicates, at least 10 larvae per condition, per

41 replicate. **(A)** Representative images show different patterns of phagocyte recruitment across

42 multiple days in larvae exposed to dexamethasone or DMSO. Scale bar = 50  $\mu\text{m}$ . **(B)** Number of  
43 macrophages recruited, **(C)** macrophage cluster area, and **(D)** number of neutrophils recruited  
44 were quantified from the images. **(B-D)** Bars represent emmeans  $\pm$  SEM and P values were  
45 calculated by ANOVA. Each line represents an individual larva. **(E, F)** Number of recruited  
46 macrophages **(E)** and neutrophils **(F)** one day before germination occurred, on the day of  
47 germination, and on the day invasive hyphae occurred were plotted for larvae that experienced  
48 fungal growth. Bars represent emmeans  $\pm$  SEM and P values were calculated by ANOVA. Each  
49 data point represents an individual larva, color-coded by replicate.

bioRxiv preprint doi: <https://doi.org/10.1101/2023.12.21.572739>; this version posted December 22, 2023. The copyright holder for this preprint (which was not certified by peer review) is the author/funder, who has granted bioRxiv a license to display the preprint in perpetuity. It is made available under a [CC-BY 4.0 International license](#).

50



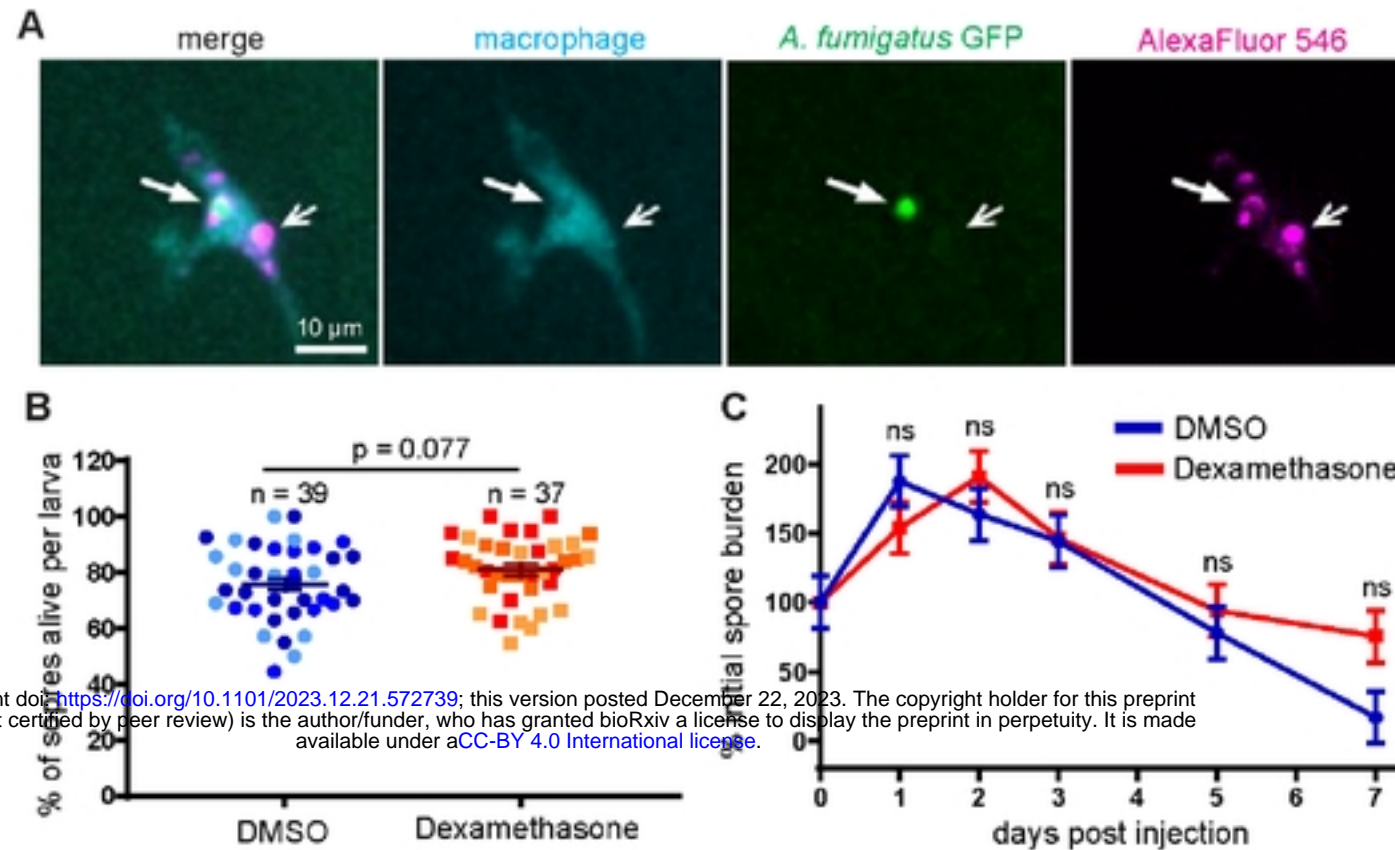

bioRxiv preprint doi: <https://doi.org/10.1101/2023.12.21.572739>; this version posted December 22, 2023. The copyright holder for this preprint (which was not certified by peer review) is the author/funder, who has granted bioRxiv a license to display the preprint in perpetuity. It is made available under aCC-BY 4.0 International license.

51

52 **Figure 3. Dexamethasone does not affect spore killing. (A, B)** Macrophage-labeled larvae  
 53 (*Tg(mfap4:BFP)*) were injected with GFP-expressing *A. fumigatus* TFYL49.1 (CEA10) spores  
 54 coated with AlexaFluor546 at 2 dpf, exposed to 10 μM dexamethasone or DMSO vehicle  
 55 control, and live imaged at 2 dpi. (A) Representative images of z projection of 3 slices showing  
 56 live (filled arrow) and dead (open arrow) spores within a macrophage. Scale bar = 10 μm. (B)  
 57 The percentage of live spores in the hindbrain per larvae is shown with bars representing  
 58 emmeans ± SEM from three independent replicates, and the total larval N per condition is  
 59 indicated. Each data point represents an individual larva, color-coded by replicate. P values were  
 60 calculated by ANOVA. (C) Wild-type larvae were injected with CEA10 spores at 2 dpf, exposed  
 61 to 10 μM dexamethasone or DMSO vehicle control, and fungal burden was quantified by  
 62 homogenizing and plating individual larvae for CFUs at multiple days post injection. Eight  
 63 larvae per condition, per dpi, per replicate were quantified, and the number of CFUs at each dpi  
 64 is represented as a percentage of the initial spore burden. Bars represent emmeans ± SEM from  
 65 three independent replicates, P values calculated by ANOVA. Average injection CFU: 32.

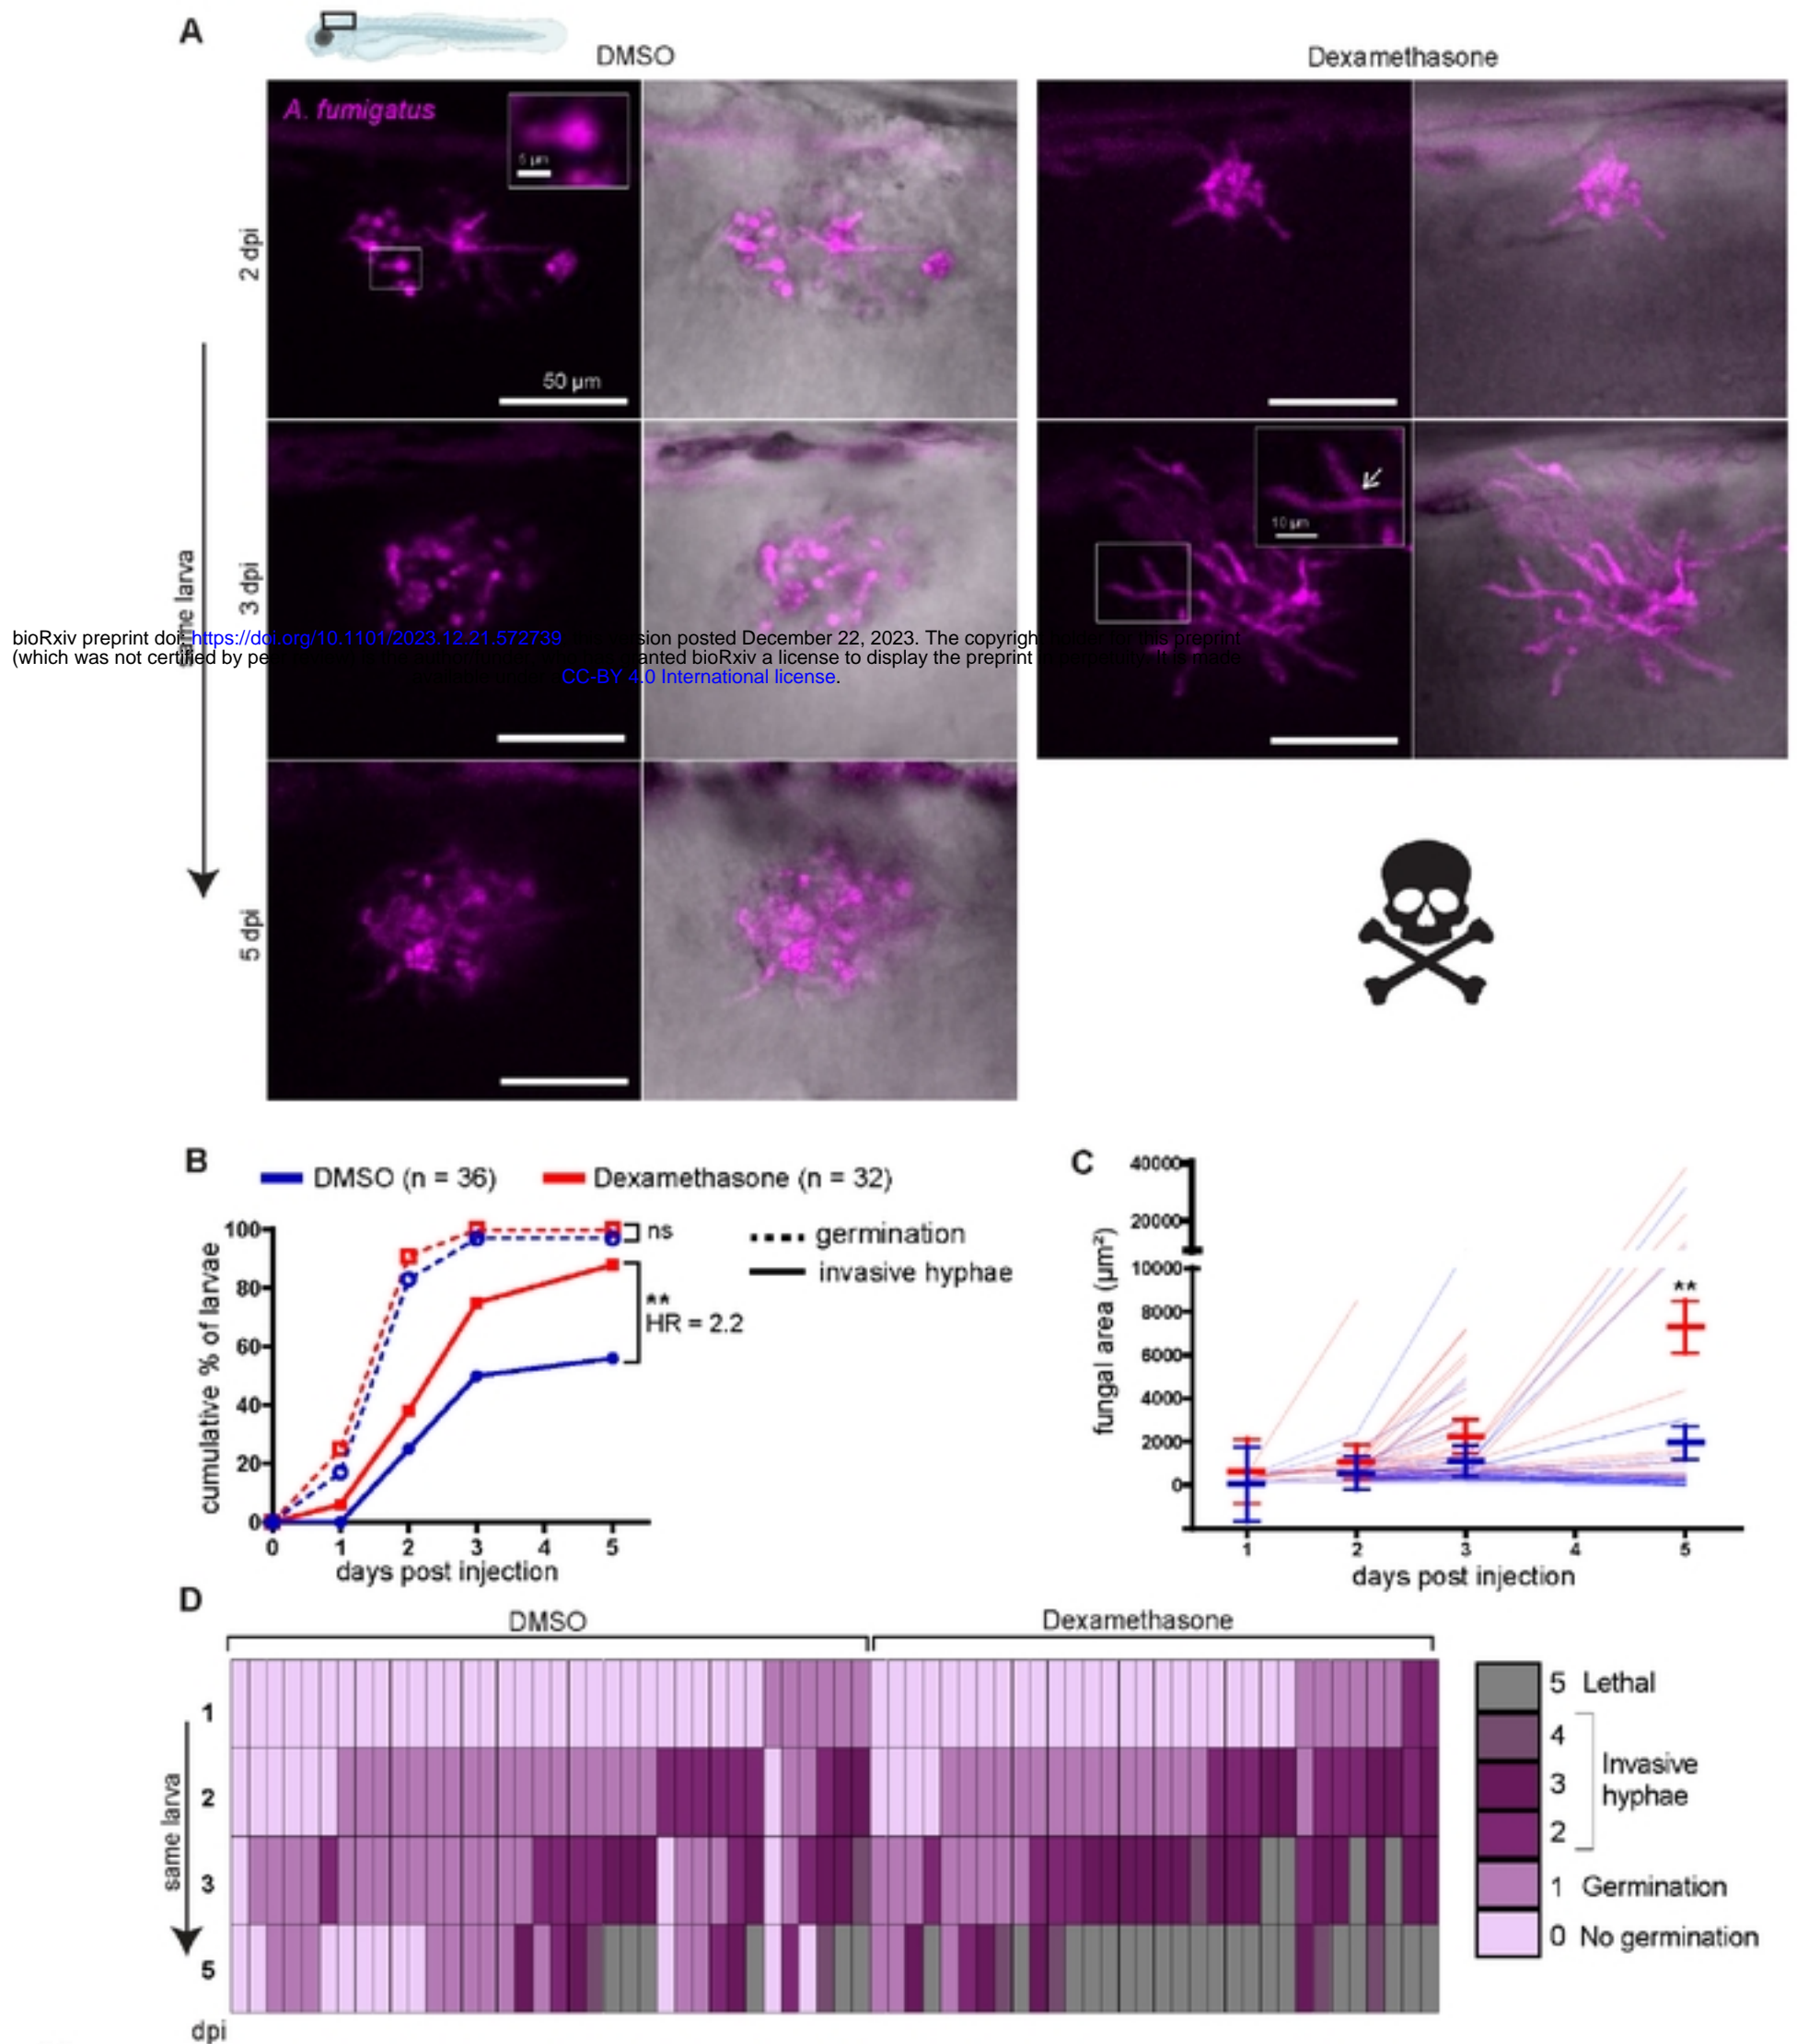



69 dpf, exposed to 10  $\mu$ M dexamethasone or DMSO vehicle control and imaged at 1, 2, 3, and 5 dpi.  
70 Data are pooled from three independent replicates, at least 10 larvae per condition, per replicate.  
71 **(A)** Representative images show hyphal growth differences in larvae exposed to dexamethasone  
72 or DMSO. Insets show a germinated spore and branched invasive hyphae (open arrow). Scale bar  
73 = 50  $\mu$ m (5 and 10  $\mu$ m in insets). **(B)** Cumulative percentage of larvae with germination (dotted  
74 line) and invasive hyphae (solid line) through 5 dpi. Cox proportional hazard regression analysis  
75 was used to calculate P values and hazard ratios (HR). **(C)** In larvae with fungal germination,  
76 fungal area was quantified from maximum intensity projection images. Each line represents an  
77 individual larva and bars represent emmeans  $\pm$  SEM. **(D)** Severity of fungal growth was scored  
78 for all larvae and displayed as a heatmap. Representative images for each score can be found in  
79 S4 Fig.

bioRxiv preprint doi: <https://doi.org/10.1101/2023.12.21.572739>; this version posted December 22, 2023. The copyright holder for this preprint (which was not certified by peer review) is the author/funder, who has granted bioRxiv a license to display the preprint in perpetuity. It is made available under aCC-BY 4.0 International license.



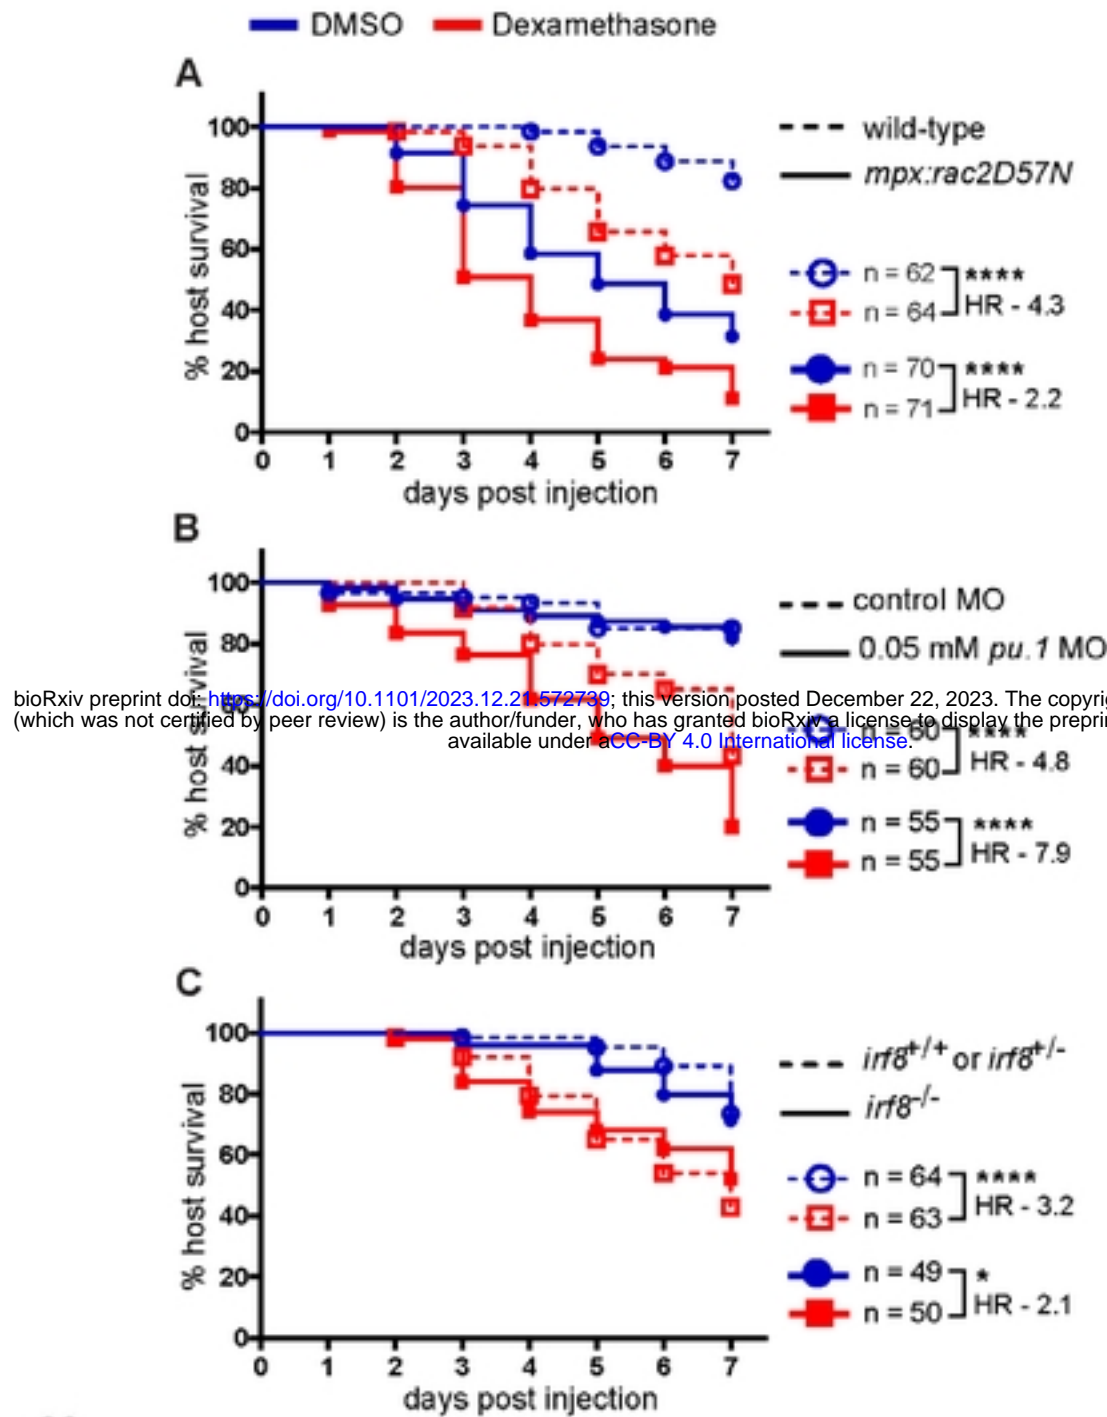

80

81 **Figure 5. Dexamethasone primarily suppresses neutrophil-mediated host protection.**

82 Survival of larvae injected at 2 dpf with CEA10 *A. fumigatus* spores and exposed to 10  $\mu$ M

83 dexamethasone or DMSO vehicle control. Data are pooled from three independent replicates, at

84 least 12 larvae per condition, per replicate and the total larval N per condition is indicated in each

85 figure. Cox proportional hazard regression analysis was used to calculate P values and hazard

86 ratios (HR). (A) Survival of neutrophil-defective larvae (*mpx:rac2D57N*) and wild-type larvae.

87 Average injection CFUs: wild-type = 26, *mpx:rac2D57N* = 29. (B) Survival of macrophage-

88 deficient or control larvae. Development of macrophages was inhibited by 0.05 mM *pu.1*

89 morpholino (MO). Control larvae received standard control MO. Average injection CFUs:

90 control MO = 31, *pu.1* MO = 25. (C) Survival of macrophage-deficient *irf8*<sup>-/-</sup> or control (*irf8*<sup>+/+</sup>  
91 or *irf8*<sup>+/-</sup>) larvae. Average injection CFUs: *irf8*<sup>+/+</sup> or *irf8*<sup>+/-</sup> = 71, *irf8*<sup>-/-</sup> = 50.

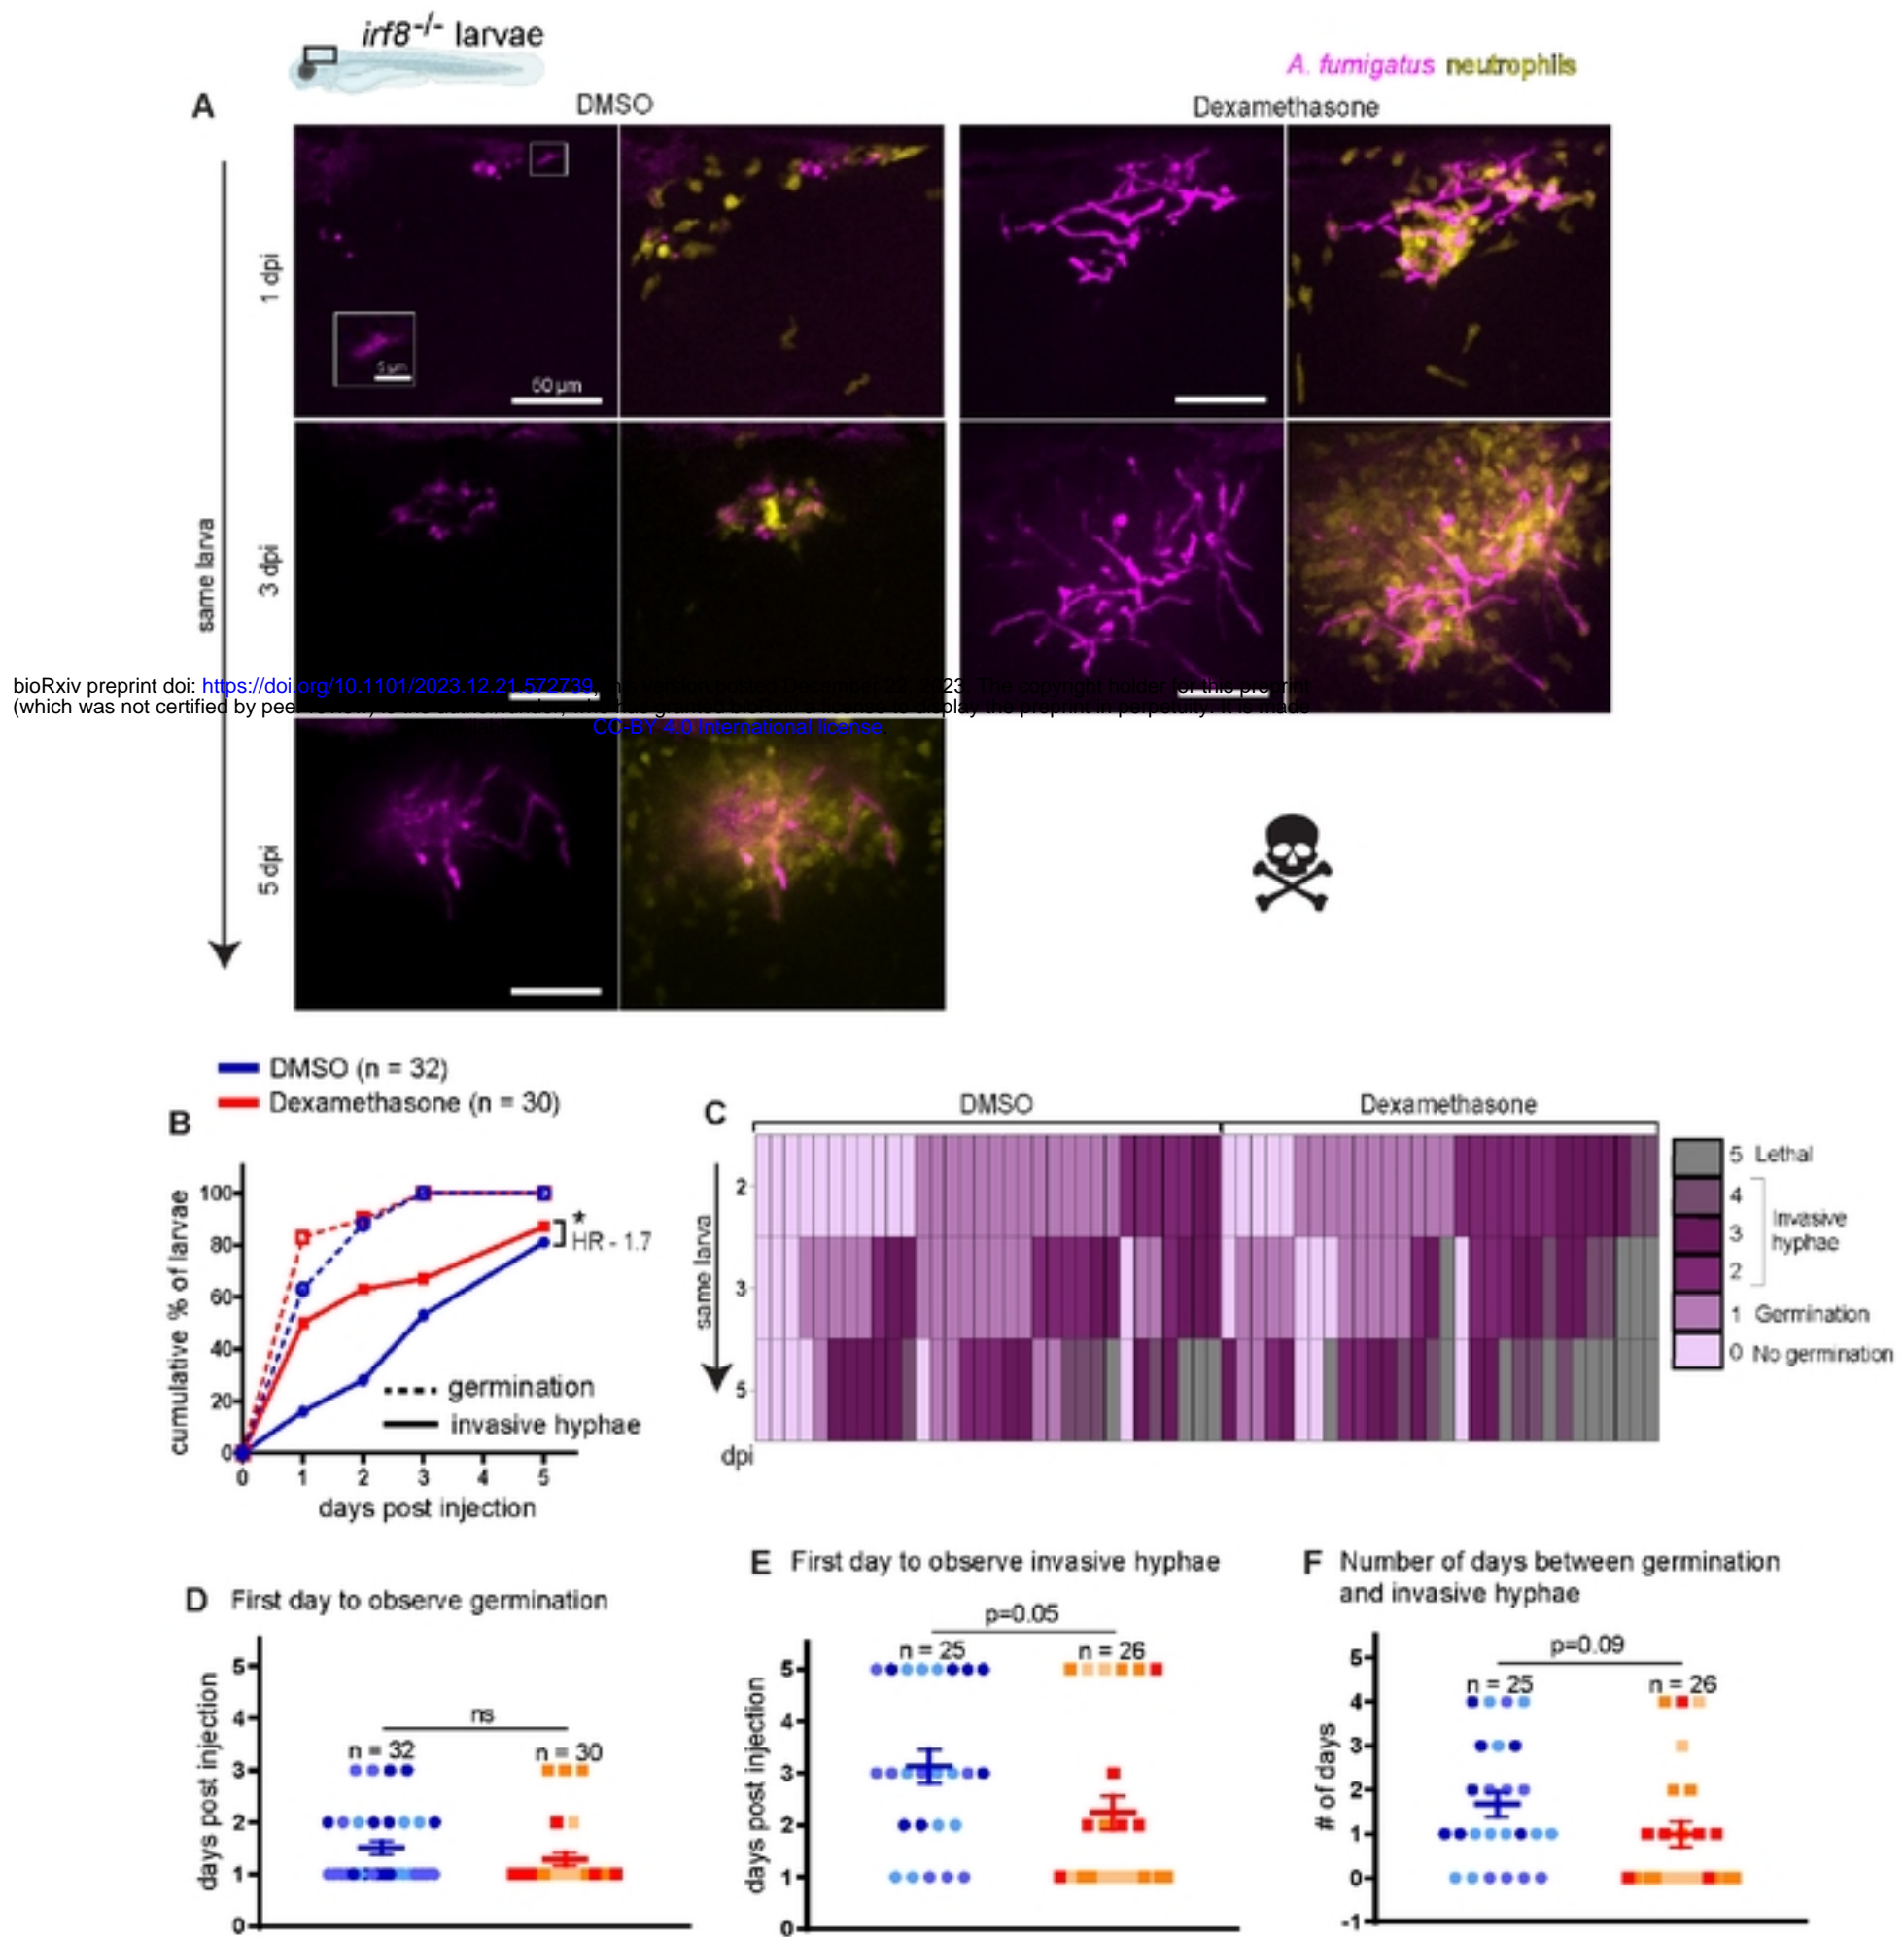

92

93 **Figure 6. Dexamethasone suppresses neutrophil-mediated control of *A. fumigatus* invasive**

94 **hyphal growth.** Macrophage-deficient *irf8<sup>-/-</sup>* larvae with labeled neutrophils (*Tg(lyz:BFP)*) were

95 injected with GFP-expressing TFYL49.1 (CEA10) spores at 2 dpf, exposed to 10  $\mu$ M

96 dexamethasone or DMSO vehicle control and live imaged at 1, 2, 3, and 5 dpi. Data are pooled

97 from three independent replicates, at least 10 larvae per condition, per replicate. **(A)**  
98 Representative images show hyphal growth differences and neutrophil recruitment in larvae  
99 exposed to dexamethasone or DMSO. Inset shows a germinated spore. Scale bar = 50  $\mu\text{m}$  (inset  
100 5  $\mu\text{m}$ ). **(B)** Cumulative percentage of larvae with germination (dotted line) and invasive hyphae  
101 (solid line) through 5 dpi. Cox proportional hazard regression analysis was used to calculate P  
102 values and hazard ratios (HR). **(C)** Severity of fungal growth was scored for all larvae and  
103 displayed as a heatmap. Representative images for each score can be found in S4 Fig. **(D-F)** In  
104 larvae in which fungal growth occurred, the day on which germination (D) and invasive hyphae  
105 (E) was first observed and the number of days between germination and invasive hyphae (F) are  
106 plotted. Bars represent emmeans  $\pm$  SEM and P values were calculated by ANOVA. Each data  
107 point represents an individual larva, color-coded by replicate.

bioRxiv preprint doi: <https://doi.org/10.1101/2023.12.21.572739>; this version posted December 22, 2023. The copyright holder for this preprint (which was not certified by peer review) is the author/funder, who has granted bioRxiv a license to display the preprint in perpetuity. It is made available under aCC-BY 4.0 International license.



bioRxiv preprint doi: <https://doi.org/10.1101/2023.12.21.572739>; this version posted December 22, 2023. The copyright holder for this preprint (which was not certified by peer review) is the author/funder, who has granted bioRxiv a license to display the preprint in perpetuity. It is made available under aCC-BY 4.0 International license.

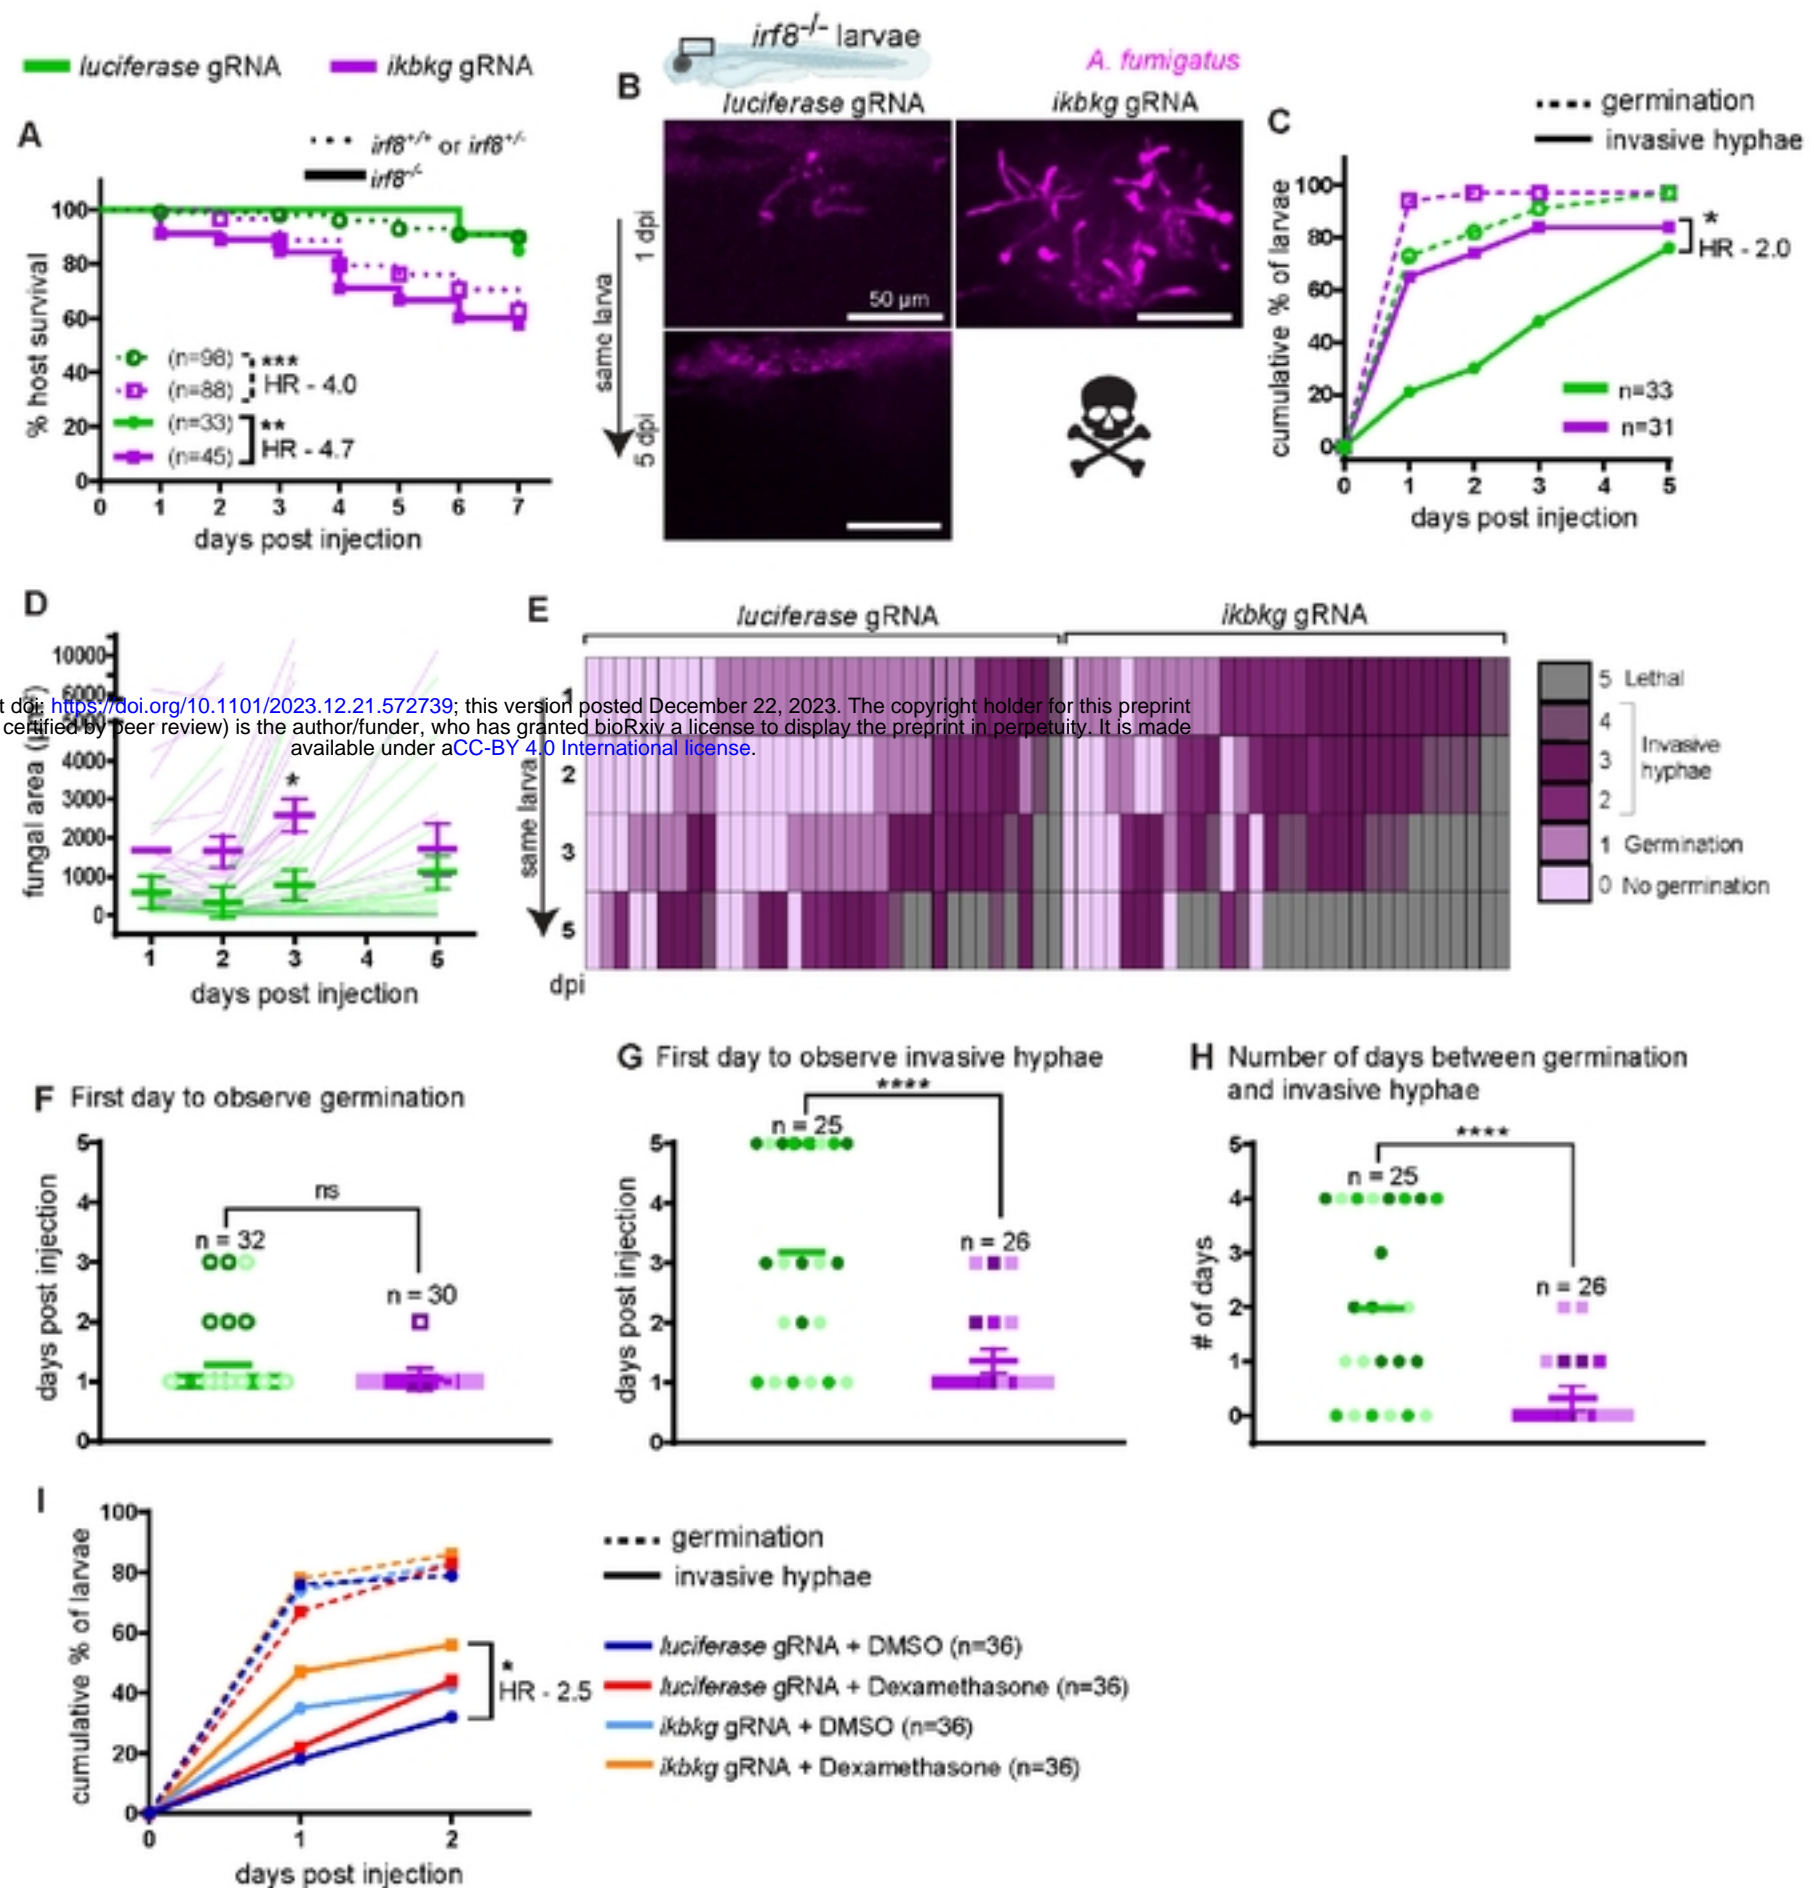

108

109 **Figure 7. Neutrophils fail to control invasive hyphal growth in IKK $\gamma$  crispant larvae.**

110 Macrophage-sufficient (*irf8*<sup>+/+</sup> or *irf8*<sup>+/-</sup>) and macrophage-deficient (*irf8*<sup>-/-</sup>) embryos at 1 cell

111 stage were injected with Cas9 protein and 2 gRNAs targeting the IKK $\gamma$  gene *ikbkg* or control

112 gRNAs targeting *luciferase*. **(A)** Survival of larvae after injection with CEA10 spores at 2 dpf.

113 Data are pooled from three independent replicates and the total larval N per condition is

114 indicated. Cox proportional hazard regression analysis was used to calculate P values and hazard  
115 ratios (HR). Average injection CFUs: control + *luciferase* gRNA = 32, control + *ikbkg* gRNA =  
116 30, *irf8*<sup>-/-</sup> + *luciferase* gRNA = 31, *irf8*<sup>-/-</sup> + *ikbkg* gRNA = 29. **(B-H)** *irf8*<sup>-/-</sup> embryos with labeled  
117 neutrophils (*Tg(lyz:BFP)*), injected with *ikbkg* or control gRNAs, were injected at 2 dpf with  
118 GFP-expressing TFYL49.1 spores and live imaged at 1, 2, 3, and 5 dpi. Data are pooled from  
119 three independent replicates, at least 10 larvae per condition, per replicate. **(B)** Representative  
120 images show hyphal growth differences in larvae injected with *ikbkg* or control gRNAs. Scale  
121 bar = 50  $\mu$ m. **(C)** Cumulative percentage of larvae with germination (dotted line) and invasive  
122 hyphae (solid line) through 5 dpi. Cox proportional hazard regression analysis was used to  
123 calculate P values and hazard ratios (HR). **(D)** Fungal area was quantified from maximum  
124 intensity projection images. Bars represent emmeans  $\pm$  SEM and P values were calculated by  
125 ANOVA. Each line represents an individual larva. **(E)** Severity of fungal growth was scored for  
126 all larvae and displayed as a heatmap. Representative images for each score can be found in S4  
127 Fig. **(F-H)** In larvae in which fungal growth occurred, the day on which germination **(F)** and  
128 invasive hyphae **(G)** was first observed and the number of days between germination and  
129 invasive hyphae **(H)** are plotted. Bars represent emmeans  $\pm$  SEM and P values calculated by  
130 ANOVA. Each data point represents an individual larva, color-coded by replicate. **(I)** *irf8*<sup>-/-</sup>  
131 larvae injected with *ikbkg* or control gRNAs were injected at 2 dpf with GFP-expressing  
132 TFYL49.1 spores, treated with 10  $\mu$ M dexamethasone or DMSO, and live imaged at 1 and 2 dpi.  
133 The cumulative percentage of larvae with germination (dotted line) and invasive hyphae (solid  
134 line) through 2 dpi is shown. Data are pooled from three independent replicates, 12 larvae per  
135 condition, per replicate. Cox proportional hazard regression analysis was used to calculate P  
136 values and hazard ratios (HR).
